1 **Extreme longevity of highly fecund termite queens achieved by mitochondrial and insulin**  
2 **upregulation without harmful lipid signatures or accumulation**

3 Sarah S  it  <sup>1, 2#</sup>, Mark C. Harrison<sup>3#</sup>, David Sillam-Duss  s<sup>4</sup>, Roland Lupoli<sup>1, 2</sup>, Tom J. M. Van  
4 Dooren<sup>5, 6</sup>, Alain Robert<sup>4</sup>, Laure-Anne Poissonnier<sup>7</sup>, Arnaud Lemainque<sup>8</sup>, David Renault<sup>9, 10</sup>,  
5 S  bastien Acket<sup>11</sup>, Muriel Andrieu<sup>12</sup>, Jos   Viscarra<sup>13</sup>, Hei Sook Sul<sup>13</sup>, Z. Wilhelm de Beer<sup>7</sup>,  
6 Erich Bornberg-Bauer<sup>3</sup> and Mireille Vasseur-Cognet<sup>1, 2, 14\*</sup>

7

8 1- UMR IRD 242, UPEC, CNRS 7618, UPMC 113, INRAe 1392, Paris 7 113, Institute of  
9 Ecology and Environmental Sciences of Paris, Bondy, France.

10 2- University of Paris-Est, Cr  teil, France.

11 3- Institute for Evolution and Biodiversity, University of M  nster, M  nster, Germany.

12 4- Sorbonne University Paris Nord, Laboratory of Experimental and Comparative Ethology  
13 UR4443, Villetaneuse, France.

14 5- UMR UPMC 113, IRD 242, UPEC, CNRS 7618, INRA 1392, PARIS 7 113, Institute of  
15 Ecology and Environmental Sciences of Paris, Paris, France.

16 6- Naturalis Biodiversity Center, Leiden The Netherlands.

17 7- Department of Biochemistry, Genetics and Microbiology, Forestry and Agriculture  
18 Biotechnology Institute, University of Pretoria, Pretoria, South Africa.

19 8- Genoscope, Fran  ois-Jacob institute of biology, Atomic energies Agency, University of  
20 Paris-Saclay, Evry, France.

21 9- University of Rennes, CNRS, ECOBIO (Ecosystems, biodiversity, evolution) - UMR 6553,  
22 Rennes, France.

23 10- University Institute of France, Paris, France

24 11- University of Technology of Compi  gne, UPJV, UMR CNRS 7025, Enzyme and Cell  
25 Engineering, Royallieu research Center, Compi  gne, France.

26 12- Cochin Institute, UMR INSERM U1016, CNRS 8104, University of Paris Descartes,  
27 CYBIO Platform, Paris, France.

28 13- Department of Nutritional Sciences and Toxicology, University of California, Berkeley,  
29 USA

30 14- INSERM, Paris, France

31

32 \* Correspondence and requests for materials should be addressed to MVC

33 email: [mireille.vasseur@inserm.fr](mailto:mireille.vasseur@inserm.fr)

34 <https://orcid.org/0000-0001-6963-4114>

35

36 #These authors contributed equally

37

38 **ABSTRACT**

39 Eusocial termite queens achieve nearly maximal fertility throughout their extremely long life  
40 without apparent signs of aging. Termites represent, therefore, an ideal model for aging  
41 research. To investigate the molecular mechanisms underlying their long reproductive life, we  
42 carried out transcriptomic, lipidomic and metabolomic analyses on fat bodies of sterile short-  
43 lived workers, long-lived kings and five stages spanning twenty years of adult queen  
44 maturation. In mature reproductives, genes supporting a robust mitochondrial functioning or  
45 associated with genome stability were upregulated. In most organisms, insulin signaling  
46 increases fertility but decreases lifespan, often accompanied by harmful lipid signatures. Our  
47 findings suggest that an upregulation of insulin-like peptide (Ilp9) in the fat body of termite  
48 queens is accompanied by a specific lipid metabolism, limiting fat storage, thus sustaining both  
49 high fertility and maintaining extreme lifespan. Our results highlight potential molecular targets  
50 for research into aging-related metabolic diseases linked to the accumulation of excess fat.

51

## 52 INTRODUCTION

53 Aging affects almost all living organisms. It is characterized by the failure of several cellular  
54 and physiological functions. This often leads to a deleterious accumulation of lipids<sup>1</sup>, while a  
55 reduction in mitochondrial functioning exacerbates oxidative stress<sup>2</sup>. In most multicellular  
56 organisms, surgical or genetic interventions which reduce fecundity can increase lifespan<sup>3</sup>,  
57 suggesting that fecundity and longevity are negatively correlated<sup>4,5</sup>. This pattern is usually  
58 explained by a trade-off, where resources allocated to fecundity are no longer available for  
59 somatic maintenance and thus survival<sup>4,6,7</sup>. However, the regulatory mechanisms and signaling  
60 pathways controlling the allocation of resources in this trade-off remain insufficiently  
61 understood<sup>8</sup>.

62 Our understanding of the causes of aging stems to a large extent from studies on short-  
63 lived model organisms<sup>9,10</sup>. Eusocial insects such as the fungus-growing termite *Macrotermes*  
64 *natalensis* (Termitidae, Blattodea) have reproductive castes which outlive their sterile siblings  
65 by orders of magnitude despite having the same genome<sup>11-13</sup>. Queens lay thousands of fertile  
66 eggs per day<sup>14</sup>, and both queens and kings can live for several decades, while workers live for  
67 only a few weeks. Long-lived termite queens seem close to their maximum possible fertility for  
68 a prolonged time without apparent signs of aging and thus with a negligible cost of  
69 reproduction<sup>15</sup>. Among social insects, termites are an excellent new natural model system for  
70 aging research. Several molecular mechanisms involved in bypassing the fecundity/longevity  
71 trade-off have been identified in social insects, but their integrated physiological effects remain  
72 poorly understood<sup>15-19</sup>.

73 Recently, transcriptomic studies in different taxa of social insects have pointed out the  
74 importance of downstream components of the Insulin/insulin-like growth factor (IGF-1)  
75 signaling (IIS) and target of rapamycin (TOR) network for aging<sup>20-22</sup>. IIS and TOR signaling  
76 have been broadly identified as key actors in the allocation of resources and aging of



77 organisms<sup>23</sup>. IIS is an evolutionarily conserved pathway which controls food intake, energy  
78 stores, energy expenditure, growth and fecundity via the IRS–PI3K–AKT signaling cascade  
79 which targets, in particular, TOR complex 1 (TORC1), inducing protein translation and *de novo*  
80 lipogenesis<sup>24</sup>. In *Drosophila*, a reduction of the activity of IIS or TOR pathways can extend  
81 lifespan substantially while reducing female fecundity<sup>25–27</sup>. Beyond the influence of these two  
82 signaling pathways on fecundity in *Drosophila*, dysregulation of the IIS or TOR pathways, for  
83 instance by the impairment of lipid metabolism, leads to the development of metabolic, age-  
84 related pathologies from *Drosophila* to humans, such as type 2 diabetes and insulin  
85 resistance<sup>28,29</sup>.

86         Physiological consequences of differences between social insect castes in IIS and TOR  
87 pathways and targets have thus far not been assessed using metabolomics or lipidomics. The  
88 fat body, which acts like the mammalian liver and white adipose tissue, is central for  
89 intermediary metabolism and energy balance in insects<sup>30,31</sup>. In *Macrotermes* termites, two  
90 castes with different reproductive roles (queens and kings) live up to high age and can be  
91 compared with short-lived castes. This permits a separation of shared lifespan prolonging  
92 mechanisms from those that differ between the sexes. Some differences can be attributed to  
93 sex-specific reproductive roles and could help to understand the absence of a cost of  
94 reproduction in females or in both sexes. Whereas a gene expression module has been proposed  
95 to characterize "queen-ness" (QCM) in termites, the analysis did not account for properties  
96 shared with kings<sup>21</sup>. Neither have the fat bodies of kings and queens of highly eusocial termites  
97 been investigated.

98         We studied *M. natalensis* abdominal fat bodies of five queen reproductive stages (adult  
99 virgin to twenty-year-old queen), long-lived reproductive kings and short-lived,  
100 nonreproductive female workers. We identified multiple biological pathways affecting aging  
101 through OMICS analyses. In queens and kings, an anticipated downregulation of the TORC1

102 signaling occurs but also an unexpected 800-fold upregulation of an insulin-like peptide gene  
103 which we called *Ilp9*. The upregulation of the *Ilp9* gene coincides with high glucose levels in  
104 the hemolymph of mature queens. This apparent insulin increase is associated with an  
105 upregulation of gene programs involved in the synthesis of proteins and specific lipids with low  
106 oxidation potential, destined for oogenesis rather than fat storage. We were able to link this  
107 phenomenon to a non-canonical downregulation of a gene coding a diacylglycerol  
108 acyltransferase (*midway*; *mdy*) in mature reproductives. Consistent with transcriptomic data,  
109 lipidomic analyses in the fat body of queens demonstrated a decrease in the concentration of  
110 preferentially stored lipids (triglycerides) and an increase in the concentration of lipids destined  
111 for oogenesis (diglycerides). Furthermore, we observed an upregulation of genes supporting a  
112 robust mitochondrial functioning and of aging-related genes associated with genome stability  
113 which may drive their long-lifespan.

114

## 115 **RESULTS**

### 116 **Analysis of gene expression patterns in fat bodies**

117 *Macrotermes natalensis* queens (QT4) and kings (KT4), which were over 20 years old, and  
118 short-lived female (minor) workers (FW) were sampled in field colonies in 2016 and in 2018.  
119 Incipient colonies were each founded from one male and one female imago (T0) collected in  
120 the field and raised for 31 months following a protocol based on the natural life history of  
121 *Macrotermes* species<sup>32,33</sup> (Fig 1a and Methods). Queens of these laboratory colonies were  
122 sampled at 3 months of age (QT1), 9 months (QT2) and 31 months (QT3). To investigate how  
123 caste and sexual maturity affect gene expression, we analysed a total of 25 transcriptomes of  
124 abdominal fat bodies. Sterile female workers FW, queens QT0-QT4 and mature kings KT4  
125 were each sampled from at least 3 independent colonies (Fig. 1a). RNA-sequencing data  
126 showed that variation in expression between castes was greater than between replicates

127 (Principal Component Analysis, PCA of top 500 genes in terms of variance, Fig. 1b). This PCA  
128 showed that FW expression was very distinct from that of KT4 and all queen stages, with a  
129 strong separation along the first axis (52% variance explained). Removing FW expression from  
130 the PCA allowed a clearer separation of the reproductive individuals within the first two axes  
131 (58% variance explained). Four distinct groups were found: young queens (QT0 and QT1),  
132 QT2, KT4 and mature queens (QT3 and QT4) (Fig. 1b). We then carried out a signed, weighted  
133 gene co-expression network analysis<sup>34</sup>. The resulting gene co-expression network (GCN)  
134 allowed us to identify nine modules of particularly strongly co-expressed genes (Fig. 1c). We  
135 identified regions of the GCN that were up- or downregulated between castes or with queen  
136 age. In accordance with the PCA (Fig. 1b), we found modules strongly and uniquely correlated  
137 with FW (blue module, 1103 genes) and KT4 (plum1 module, 116 genes). One yellow module  
138 was upregulated in mature queens, QT3 and QT4 (yellow module, 537 genes). Finally, the light-  
139 cyan module (3455 genes) may be related to long-lived reproductives QT4 and KT4, though  
140 the latter only as a trend (KT4 0.39  $p = 0.05$ ). This largest of the modules was enriched for  
141 functions related to transcription and general protein synthesis. We subsequently tested for  
142 expression differences between specific pairs of castes or ages in all or a subset of individual  
143 genes.

144

#### 145 **Long-lived reproductives share expression patterns underlying remarkable lifespan**

146 Despite their pronounced sexual dimorphism, the king and the queen in *M. natalensis* have  
147 similar longevity. A comparison of transcriptomic profiles in fat bodies of KT4 and QT4 with  
148 FW allows us to look at genes potentially underlying lifespan (Supplementary Fig.1),  
149 irrespective of reproductive efforts distinguishing kings from queens. A total of 1454 genes  
150 were upregulated in fat bodies of KT4 and QT4 including 350 genes that differed between KT4  
151 and QT4. In addition, 2208 genes were downregulated in KT4 and QT4, 468 of which were

152 significantly different between KT4 and QT4. We observed significantly upregulated  
153 expression of components of IIS signaling in the fat bodies of KT4 and QT4 with *Ilp9* (800-  
154 fold increase), *pi3k59f* and two insulin targets *eIF6* and *crc*<sup>35</sup> (Fig. 2 and Supplementary Tables  
155 1 & 2). These results were accompanied by the upregulation of gene expression involved in  
156 several processes related to protein and macromolecule synthesis (Supplementary Fig. 1). In  
157 contrast, the expression of *InR2* and several actors involved in the TORC1 signaling pathway  
158 (*tor*, *raptor* and its *S6K* substrate) were downregulated in QT4 and KT4, as well as the *mdy*  
159 lipid metabolism gene (Fig. 2 and Supplementary Tables 1 & 2). *Mdy* is a diacylglycerol  
160 acyltransferase gene coding an enzyme catalysing the final step of triglyceride (TG) synthesis  
161 from diglycerides (DG)<sup>36</sup>. This downregulation of the *mdy* gene suggests a decrease of fat  
162 storage in reproductives. Moreover, the expression of many genes important for genome  
163 stability, including genes involved in DNA damage response and telomere maintenance, was  
164 upregulated in KT4 and QT4 (Fig. 2 and Supplementary Tables 1 & 2). In addition, several  
165 genes coding for the OXPHOS systems and the mitochondrial ribosomal proteins,  
166 mitochondrial transport and mitochondrial fission were upregulated in QT4 and KT4 (Fig. 2  
167 and Supplementary Tables 1 & 2). These results suggest that mitochondrial function was  
168 maintained in the fat body of long-lived reproductives with likely beneficial effects on cell  
169 integrity and oxidative status. Accordingly, we observed a downregulation of the expression of  
170 antioxidant genes in QT4 and KT4 compared to FW (Fig. 2 and Supplementary Table 1 & 2).

171 Together, these results suggest that long-lived reproductives share several expression  
172 differences from workers in agreement with a reduction or absence of aging, but also an  
173 unexpected upregulated expression of several components of the IIS pathway and a  
174 downregulated expression of *mdy* and antioxidant genes.

175

176 **The fat body of highly fecund and long-lived queens indicates a specific energetic gene**  
177 **program**

178 To better understand differences in metabolic gene programs which might be explained by  
179 mature queen reproduction and relate to the absence of costs of reproduction, we mapped the  
180 differentially expressed genes (DEGs) in the fat bodies of FW and QT4 to the GCN and focused  
181 on patterns where QT4 differ from FW and KT4, which oogenesis might explain. These DEGs  
182 occupied very distinct regions of the network, with genes upregulated in FW mainly contained  
183 within the blue, light-yellow and light-green modules and DEGs in reproductives mainly  
184 contained within light-cyan (Fig. 1c). Although reproductives have several DEGs in common,  
185 differences between KT4 and QT4 occur: genes contained in the plum module were specifically  
186 up-regulated in KT4 while genes in the yellow module were specifically up-regulated in QT4  
187 (Fig. 1c). Upregulated gene expression in FW was centered around cell signaling and responses  
188 to stimuli, whereas gene expression in QT4 and KT4 was mainly related to macromolecule  
189 synthesis with higher protein production in the KT4 fat body (Fig. 1c and Supplementary Fig.  
190 2). Several genes involved in IIS pathway were differentially regulated in QT4 relative to FW  
191 and KT4. *InR3* and *pdk1* expression were upregulated in QT4 compared to FW, and  
192 downregulated in KT4 (Supplementary Table 3). *pi3k59f* and *crc* were more strongly  
193 upregulated in QT4 than in KT4 (Supplementary Table 2). In QT4, we also observed an  
194 upregulation relative to FW of *pi3k21b* genes encoding the kinases involved in the IIS pathway  
195 (Supplementary Table 2). In contrast, *pi3k92e* gene expression was downregulated in the fat  
196 body of QT4 relative to FW (Supplementary Table 2). In response to carbohydrates, insulin  
197 concentration increases and activates, via the IIS pathway, glycolysis and *de novo* lipogenesis  
198 and increase mRNA translation<sup>35,37</sup>. We found major differences in gene expression within  
199 carbohydrate and lipid metabolism pathways between QT4 and both FW and KT4. Several  
200 genes, located in the blue and light-green GCN modules and involved in the glycogenesis and

201 trehalose energetic storage pathways, were upregulated in FW (Supplementary Tables 1-3).  
202 Trehalose-6-phosphate synthase was upregulated relative to QT4, but not to KT4  
203 (Supplementary Table 3). In QT4, on the other hand, several genes of the yellow and light-  
204 cyan GCN modules which are key players in carbohydrate catabolism were upregulated relative  
205 to KT4 and FW, particularly genes encoding enzymes involved in glycolysis (e.g. *cg6650* also  
206 known as *adpgk*, *pfk* and *pkm*; Supplementary Table 3), as well as hexosamine biosynthetic  
207 pathway (HBP) and pentose phosphate pathway (PPP) (Supplementary Tables 2 & 3). These  
208 were found next to those promoting fatty acid (FA) synthesis from carbohydrates (*acc* and  
209 *fasn1*; Supplementary Table 3). Interestingly, the expression of genes promoting FA activation,  
210 esterification and elongation was also upregulated in QT4 relative to KT4 and FW  
211 (Supplementary Table 3). Heightened DG transport in QT4 is suggested by an upregulation  
212 relative to FW and KT4 of expression of lipoprotein genes essential for oogenesis, such as the  
213 female-specific vitellogenin (*vg*) and the diacylglycerol-carrying lipoprotein (*hdlbp*)  
214 (Supplementary Tables 2 & 3).

215 Overall, the results of this comparison suggest that the metabolism of FW tends to  
216 facilitate energetic storage while the QT4 metabolism seems to be oriented towards the  
217 utilization of energy resources for reproduction (oogenesis), more strongly so than KT4.

218

219 **Transcriptomic analysis of queens at different stages highlights adult developmental**  
220 **remodeling and expression changes within the highly fecund mature stage.**

221 Concomitantly with the development of colonies, the imaginal fat body of virgin females (QT0)  
222 with fat storage tissue becomes replaced by a royal fat body (QT4) which is highly oriented  
223 towards specific protein synthesis and secretion<sup>38</sup>. Since endoreduplication (the replication of  
224 DNA during the S-phase of the cell cycle without subsequent cell division) was specifically

225 reported for the fat body of queen termites<sup>39</sup>, we recorded polyploidization in the fat body  
226 during queen maturation using flow cytometry. Moreover, to investigate the molecular  
227 mechanisms involved in the establishment of the dedicated energetic metabolism in mature  
228 QT4 and in the change of fat body identity with maturation, we compared gene expression  
229 between adult females in five life stages (Fig. 1a). Different regions of the gene co-expression  
230 network were upregulated in each stage (Fig. 3), and we focus on comparing expression  
231 differences between adjacent stages.

232 First of all, the level of expression of *Ilp9*, *InR3* and *vg* genes was not different between  
233 QT3 and QT4 (Supplementary Table 4 and Fig. 4). However, *crc* gene expression  
234 (Supplementary Table 4) and genes involved in glycolysis and OXPHOS, mitochondrial  
235 membrane transport proteins and mitochondrial ribosomes, were all strongly upregulated in  
236 QT4 compared to QT3 (Supplementary Table 4). Accordingly, GO terms suggest an increase  
237 of several processes linked to protein synthesis and secretion (Fig. 3). We can conclude from  
238 this that among mature queen stages, substantial further upregulation of important processes  
239 can occur with reproductive age and that these reinforce the energy metabolism discussed  
240 above. In particular, mitochondrial functions seem to be upregulated substantially with age.  
241 Other main aspects of mature queen metabolism might be present already in young queens,  
242 before massive reproduction occurs.

243 Queens live several weeks without food after mating, due to a lack of workers which  
244 feed all colony members<sup>38</sup>. The imaginal fat body of virgin females (QT0) at the start of this  
245 starvation period displayed high expression of genes associated with intracellular signal  
246 transduction, such as the superfamily Ras which notably controls cell growth. We observed that  
247 *Egfr* gene expression and downstream signaling cascades, such as *Ras/Mapk* signaling were  
248 upregulated in comparison to QT1 (Supplementary Table. 4). GO analysis revealed that several  
249 signaling pathways involved in development and apoptosis were upregulated as well (Fig. 3).



250 Furthermore, within the IIS pathway, expression of *InR2*, *InR3*, *pi3k21b*, and *Akt1* were  
251 upregulated (Supplementary Table 4).

252 At the end of the starvation period (stage QT1), we observed an enrichment of GO terms  
253 related to an increase of catabolic processes (Fig. 3), an upregulation of genes involved in  
254 pathways linked to an increased use of reserves. More specifically we observed an upregulation  
255 of *Ampka* gene expression (AMP-activated Protein Kinase  $\alpha$ ; Supplementary Table 4) known  
256 to be activated under conditions of low energy to redirect the metabolism and restore energy  
257 balance by inhibiting anabolic processes and promoting catabolic processes and mitochondrial  
258 functioning<sup>40</sup>. Consistent with the increase of *Ampka* gene expression, we observed increased  
259 expression of genes involved in several catabolic processes such as  $\beta$ -oxidation and proteolysis  
260 (Fig. 3 & 4), as evidenced by the upregulation of several genes coding for subunits of the  
261 proteasome and autophagy and a decrease of anabolic processes such as lipogenesis  
262 (Supplementary Table 4 and Fig. 4). We observed further responses which can be explained as  
263 stress responses to starvation. AMPK is known to influence mitochondrial homeostasis by  
264 initiating both the degradation of damaged mitochondria and mitochondrial biogenesis<sup>40</sup>. We  
265 observed an upregulation of two genes involved in mitochondrial fission (*drp1* and *fis1*) known  
266 to facilitate mitochondrial degradation by autophagy and two genes involved in a specific  
267 degradation of mitochondria via autophagy called mitophagy, *cg5059* also known as *BCL2*  
268 *interacting protein 3* and *pink1* (Supplementary Table 4). Moreover, we observed an  
269 upregulation of the expression of genes involved in the OXPHOS system, mitochondrial  
270 ribosome subunits and mitochondrial transport proteins, suggesting an increase in mitochondria  
271 biogenesis (Supplementary Table 4). Finally, we observed an increased expression of  
272 antioxidant genes (Supplementary Table 4) which are known to be upregulated by AMPK in  
273 situations of oxidative stress<sup>41</sup>.



274 At QT2, antioxidant defense processes, as well as *Ampk $\alpha$*  gene expression, were  
275 downregulated again (Supplementary Table 4). At this stage, GO terms showed that several  
276 processes were linked to protein metabolism (Fig. 3). We believe that QT2 are fed by workers.  
277 This is consistent with the increase in the number of workers per colony (Supplementary Fig.  
278 3b) and of fungus development (Supplementary Fig. 3c). *Ilp9*, *pi3k21b* gene expression, and *de*  
279 *novo* lipogenic genes were upregulated in QT2 compared to QT1, suggesting a first activation  
280 of IIS pathway components in the fat body of QT2 (Supplementary Table 4 and Fig. 4). At the  
281 same time, we observed a downregulation of *mdy* gene expression, even relative to the mature  
282 queen stages (Fig. 4). In addition, several genes involved in the cell cycle, including *mcm2*, *5*,  
283 *6*, *7* and *10*, several cyclins and cyclin-dependent kinases, such as *cycE/cdk2* and *orc1*, and the  
284 proto-oncogene *myc* were up-regulated (Supplementary Table 4). Associated to these genes,  
285 we observed an increase in QT2 fat body endoreduplication levels, with the proportion of 4C  
286 nuclei now exceeding 70 % (Fig. 5) in comparison to 35% in QT0 and QT1. Taken together,  
287 these data suggest that QT2 is a transitory stage where maturation is prepared or initiated in  
288 many processes.

289 In QT3, the abdomen has become enlarged. During this period, expression of *Ilp9* and  
290 *InR3* genes was upregulated in comparison to QT2 whereas *InR2* gene expression decreased  
291 (Supplementary Table 4). We also observed an upregulation of genes involved in glycolysis,  
292 HBP and PPP (Supplementary Table 4). Similarly, the expression of genes involved in *de novo*  
293 lipogenesis, as well as FA activation, elongation, esterification and transport were upregulated  
294 (Fig. 4). This is in accordance with increased fertility and associated genes, such as *vg* (Fig. 4)  
295 and these expression patterns do not change further in QT4. We found that over 90% of all cells  
296 in the fat bodies of QT3 and QT4 have 4C nuclei (Fig. 5).

297 Overall, these data suggest that the energy metabolism of young queens shows many  
298 characteristics in accordance with their starvation period. With social nutrition (increase in the

299 number of workers and food availability), colony sizes increase. The QT2 stage acts as a  
300 transitional period where the energy metabolism of mature queens becomes established. This  
301 is associated with an upregulation of several specific insulin-signaling genes and a  
302 downregulation of genes involved in lipid storage (*mdy*). Other lifespan affecting processes  
303 seem to be initiated in QT2 (e.g., upregulation of IIS pathway components), or in QT4, long  
304 after maturation (e.g. upregulation of mitochondrial functions).

305

### 306 **Major changes in metabolites and lipid composition in mature queens reflect their** 307 **transcriptomes**

308 We investigated hemolymph metabolomes in FW and queen maturation stages (QT0-QT4).  
309 Metabolomes differed between FW and QT4, and between each pair of successive queen  
310 maturation stages (pairwise perMANOVA each  $p < 0.05$ , Fig. 6). FW and QT0 seemed little  
311 different overall, while starved QT1 were well separated from the QT2 individuals in transition  
312 towards massive reproduction (Fig. 6). Physogastric QT3 were globally intermediate between  
313 QT0, QT2 and QT4 (Fig. 6). We compared individual metabolite concentrations between FW  
314 and QT4 and between successive queen maturation stages (Supplementary Figure 4 and Table  
315 5). Glucose and galactose are the metabolites present in the largest concentrations in QT4. This  
316 high concentration of glucose<sup>42</sup> occurred similarly in FW but not in any of the younger queen  
317 stages. Surprisingly, the concentration of trehalose was lower in QT4 than in FW or in any other  
318 queen stage. Alanine, glycerol, aspartic acid, phenylalanine and glutamic acid occur in larger  
319 concentrations in QT4 than FW, corresponding with ongoing increased protein and lipid  
320 synthesis. Relative to QT0, starved queens QT1 have increased levels of leucine, threonine,  
321 isoleucine and citric acid, which decrease again in QT2 and are indicative of proteolysis during  
322 starvation.

323           The lipidomic analysis in hemolymph revealed eighty-one esterified lipid species of  
324    which 34 differed in quantity and composition between FW and QT4 (Fig. 7 and Supplementary  
325    Table 6). Strikingly, DG were significantly elevated in QT4 relative to FW while TG were  
326    significantly diminished (Fig. 7 and Supplementary Table 6). Furthermore, we compared lipid  
327    compositions between the fat bodies of young QT0, the transitional stage QT2 and QT4 mature  
328    queens (Fig. 8a and Supplementary Table. 7). Thirteen TG concentrations were significantly  
329    lower in QT4 relative to QT0 while other changes were often in the same direction as in  
330    hemolymph. We investigated changes in PUFA/MUFA/SFA proportions in hemolymph of FW  
331    and QT4 and in fat bodies of QT0, QT2 and QT4. In hemolymph, PUFA/MUFA/SFA  
332    proportions were not significantly different between FW and QT4 (Fig. 7b). In contrast,  
333    PUFA/MUFA/SFA proportions in fat bodies of QT2 and QT4 were significantly different from  
334    QT0 (PERMANOVA,  $p$ -value  $< 0.05$ ) (Fig. 8b). This difference seemed to be related to a larger  
335    proportion of PUFA in QT0 compared to QT2 and QT4 (Fig. 8b). The determination of fatty  
336    acid composition in fat bodies of queens allowed us to evaluate the levels of oxidative cell  
337    damage. We calculated the relative peroxidability of membranes (peroxidation index, PI),  
338    which decreased drastically from 29.5 at QT0, 7.9 at QT2 to 1.9 at QT4 (Fig. 8c).

339           Several hemolymph metabolites discriminate young queens, old queens and workers, in  
340    agreement with results from fat body transcriptomics and highlight the importance of simple  
341    sugars. Moreover, we observed that lipid concentrations in QT4 are consistent with the  
342    upregulation of genes involved in the IIS pathway, *de novo* lipogenesis and with a  
343    downregulation of *mdy* gene expression. Indeed, QT0 metabolism, as in FW, tends to facilitate  
344    TG storage while the QT4 metabolism seems to be oriented towards the utilization of resources  
345    for oogenesis without harmful lipid signatures.

346

347

## 348 **DISCUSSION**

349 Our results demonstrate that termite queens mobilize several mechanisms to sustain fertility  
350 and enable their remarkable lifespan without apparent costs of long-term massive reproduction.  
351 Against expectations, a gene coding an insulin-like peptide and components of the IIS pathway  
352 are upregulated in the fat body of highly fertile long-lived queens. The composition of lipids,  
353 the scarcity of stored fat observed in fat bodies of long-lived queens and the upregulated  
354 mitochondrial functions indicate that the energy metabolism required for reproduction remains  
355 efficient up to high age and does not require reserves to be stored in the queen's fat body.

### 356 *Long lifespan on a carbohydrate diet*

357 The intermediary metabolism in QT4 is centered on a high use of carbohydrates with an  
358 increase of glycolysis and the OXPHOS system for energy generation and the synthesis of  
359 specific lipids and proteins. The unexpected low trehalose concentration in long-lived queens,  
360 coupled with their high glucose levels also occurring in workers suggest that either trehalose is  
361 promptly hydrolyzed in physogastric queens or that glucose is an important component of what  
362 workers feed to physogastric queens in colonies with a well-developed fungus, without much  
363 trehalose synthesis in these queens. Poulsen *et al.*<sup>43</sup> have additionally shown that the diversity  
364 of decomposition enzymes encoded by the queen's microbiota is low and geared towards  
365 hydrolyzing simple sugars. Overall, all results confirm that long-lived queens receive a highly  
366 energetic feed enriched in simple sugars. In many organisms from *Drosophila* to humans, a  
367 prolonged carbohydrate-rich diet is associated with chronic metabolic diseases reducing  
368 lifespan<sup>29,44</sup>. Increased insulin secretion caused by such a diet leads to the accumulation of  
369 triglycerides, and disrupts IIS signaling over time leading to the development of insulin  
370 resistance<sup>37,44,45</sup>. In *M. natalensis* QT4, we were able to link the limited production of  
371 triglycerides from diglycerides to the non-canonical downregulation of a gene coding a

372 diacylglycerol acyltransferase (*mdy*), thus limiting a harmful accumulation of triglycerides in  
373 the fat body.

374 *Antioxidant defense is strongest in young queens*

375 In young queens before mating (QT0), we observed an activation of the EGFR signaling  
376 pathway and downstream signaling cascades that are known to coordinate multiple responses  
377 such as the activation of apoptosis and remodeling (as described by Larsen<sup>46</sup>, see also caste  
378 determination in the honey bee<sup>47</sup>). After mating, three months pass before the appearance of  
379 workers which feed all colony members. We observed that during the starvation period ending  
380 at the QT1 stage, the absence of nutrition is associated with an upregulation of genes coding  
381 for mitochondria biogenesis (OXPHOS system, mitochondrial ribosome subunits and transport)  
382 and mitochondrial fission and degradation by autophagy. We also observed an upregulation of  
383 the expression of genes coding for antioxidant enzymes which may suggest an increase of ROS  
384 production. Several studies demonstrated that during calorie restriction, mitochondrial stress  
385 induced by a transitory increase of ROS leads to a cellular adaptive response named  
386 mitohormesis which allows an increase in stress resistance and promotes health and vitality<sup>48</sup>.  
387 We propose that a mitohormesis response occurs at the QT1 stage. Interestingly, gene  
388 expression coding mitochondrial synthesis becomes upregulated again in mature queens, with  
389 increased production in QT4 and at KT4 suggesting a maintenance of mitochondrial  
390 biosynthesis which could be beneficial for health span. Associated with these results, we  
391 observed a decrease of genes coding for antioxidant enzymes in reproductives. Similar results  
392 were observed in honey bee<sup>49</sup> and ant<sup>50</sup> queens. These findings suggest that the mitochondria  
393 of long-lived reproductives remain efficient and produce a comparatively low amount of ROS,  
394 thus limiting oxidative damage, one of the main drivers of aging.

395

396

397 *Surprising upregulation of IIS pathway components*

398 We observed several modifications, potentially triggered by social nutrition at the QT2 stage.  
399 We observed a first upregulation of the *vg* gene. As recently suggested for other termite  
400 species<sup>39</sup>, polyploidy in the fat body of *M. natalensis* queens can boost their egg production by  
401 increasing protein synthesis, notably VG. In *Drosophila*, seven out of eight insulin-like peptides  
402 (DILPs) are mainly produced in the brain insulin-producing cells except for DILP6, which is  
403 produced in the fat body. *dIlp6* gene expression is up-regulated during starvation<sup>51,52</sup>. In the  
404 social bee, *Apis mellifera*, two *Ilp* genes coding AmILP1 and AmILP2 are expressed in both  
405 tissues<sup>53</sup>. In *M. natalensis*, we identified only two genes from separate loci coding an ortholog  
406 to DILP7 (not expressed in *M. natalensis* fat bodies) and a further paralog found across holo-  
407 and hemimetabolous insects, without a clear ortholog in *Drosophila melanogaster*, which we  
408 called *Ilp9* (Supplementary Fig. 5). During queen maturation, we observed potential increases  
409 in insulin suggested by upregulated expression of *Ilp9*. If this occurs in long-lived queens in  
410 response to increases in some carbohydrates, then this would be reminiscent of processes in  
411 mammalian pancreatic beta-cells<sup>54</sup>. Not only does the expression of *Ilp9* increase concomitantly  
412 with the formation of the royal fat body, it is also approximately 800-fold more expressed in  
413 fat bodies of reproductives compared to workers. The increase of *Ilp9* gene expression was not  
414 associated with an activation of TORC1, although the expression of genes involved in protein  
415 synthesis were upregulated in the fat body of reproductives. However, we observed an increase  
416 of *eIF6* gene expression which is involved in insulin-stimulated translation, most notably  
417 controlling adipogenic transcription factors like *crc* (also known as *ATF4*), a member of the  
418 mTOR-independent pathway<sup>35,55</sup>. We propose that the IIS pathway, including the *Ilp9* gene,  
419 activates the *eIF6-crc* gene program in the fat body of mature queens and kings. This in turn  
420 increases the synthesis of proteins involved in lipid synthesis and essential for fecundity, despite  
421 a downregulation of the TORC1 signaling pathway elsewhere described as the main pathway

422 for protein synthesis<sup>56</sup> and also downregulated in whole bodies of reproductives of lower  
423 termite species<sup>21,22</sup>.

424

425 *No damaging fat signatures and no fat storage in long-lived queens*

426 Simultaneously with the gradual establishment of the pattern of IIS signaling, we observed a  
427 gradual upregulation of *de novo* lipogenic genes. Calculations based on lipid compositions in  
428 fat bodies of queens of different ages highlighted significant changes in the proportion of  
429 PUFA/MUFA/SFA with a decrease of PUFA concentrations. PUFA are a thousand times more  
430 likely to oxidize than MUFA<sup>57</sup>. The oxidation of PUFA can set off an oxidative cascade with  
431 the formation of radicals capable of damaging surrounding macromolecules and tissues<sup>57</sup>.  
432 Therefore, this decrease in PUFA concentrations can lead to a reduction in oxidative damage  
433 and thus increase lifespan of queens. In agreement with this, we found a strong, progressive  
434 decline of the peroxidation index (PI) indicating resistance of membranes to peroxidative  
435 damage. Several studies in mammals, birds and invertebrates<sup>57,58</sup> have demonstrated that PI  
436 values inversely correlate with longevity. In honey bees, queens also have a lower PI than  
437 female workers<sup>57</sup>. Moreover, gradually downregulated expression of the *mdy* gene, coding a  
438 diacylglycerol acyltransferase enzyme catalysing the final step of TG synthesis from DG<sup>59</sup>,  
439 corroborates the decrease of TG concentrations we observed during adult queen maturation  
440 suggesting very limited storage of lipids in favor of immediate utilization. Also, we observed a  
441 trend for DG to increase, which are known to be preferably used for lipid transport (not free  
442 fatty acid as in vertebrates)<sup>60</sup>. Han & Bordereau already observed almost forty years ago by  
443 electronic microscopy that lipid droplet number decreases during *Macrotermes* termite queen  
444 maturation<sup>38</sup>. The decrease of *mdy* gene expression was also observed in the fat body of mature  
445 kings, suggesting that the low level of stored TG can be generally beneficial for long-lifespan  
446 in reproductives and is not just explaining the absence of a cost of reproduction in queens. This

447 suggests that the gene network involving *mdy* would be a target for research linked to the  
448 accumulation of excess fat.

449         Although further investigations of, for example, kings of different ages and also  
450 functional studies are necessary, our unique analysis reveals a remodeling of the fat body during  
451 adult queen maturation concomitantly with changes in nutritional and social conditions. The  
452 results suggest that the IIS signaling network may have been adapted in queen fat bodies to  
453 maintain high fertility while also enabling their remarkable lifespan. Together with the  
454 composition of lipids and the scarcity of stored fat observed, this seems to optimize both  
455 sustained fecundity and health span, avoiding hyperfunction<sup>61</sup> and defying the trade-off  
456 between reproduction and survival. Finally, we observed several upregulated cellular functions  
457 in mature reproductives that are otherwise known to decline with age, notably mitochondrial  
458 functions and DNA damage repair. Altogether, our findings on the aging process of *M.*  
459 *natalensis* highlight potential molecular targets which could be involved in age-related  
460 metabolic diseases in humans.

461

## 462 **METHODS**

### 463 **Species studied**

464 The termite *Macrotermes natalensis* (Haviland, 1898) belongs to the Macrotermitinae  
465 (Termitidae, Blattodea), the only subfamily that has established an exo-symbiotic obligatory  
466 relationship with basidiomycete fungi of the genus *Termitomyces*<sup>62</sup>. It lives in large colonies in  
467 Southern Africa where it builds massive mounds<sup>63</sup>. When the colony is mature and in  
468 appropriate environmental conditions, winged male and female imagoes leave the mound  
469 during spring and disperse in synchronous swarms across colonies<sup>64</sup>. Male imagoes locate  
470 female imagoes<sup>65</sup> and after pairing, couples perform dealation and establish new colonies as



471 queen and king<sup>64</sup>. They mate throughout their life and fertilize all eggs. Few months after the  
472 establishment of the colony, workers explore the environment to collect spores and to inoculate  
473 the fungus comb they build in the nest<sup>66</sup>. During the first years larvae emerge which become  
474 sterile workers or soldiers<sup>67</sup>. Minor workers and soldiers are female and major workers are  
475 male<sup>68</sup>. Mature colonies contain around one million short-lived sterile individuals. Workers  
476 feed all colony members through trophallaxis (transfer of food from mouth to mouth), after a  
477 complex digestion of lignocellulose by the fungus and intestinal microbiota<sup>43</sup>. The royal couple  
478 lives for more than 20 years in a royal cell<sup>11,69</sup>. The old queen lays thousands of eggs per day<sup>14</sup>  
479 while the median lifespan of a worker is 56 days<sup>12,33</sup>. After five to seven years, some larvae  
480 develop into nymphs which become imagoes after several instars.

## 481 **Sampling**

482 Field colonies opened to collect animals had been followed for over 20 years by Jannette  
483 Mitchell in a field belonging to the University of Pretoria (coordinates in Supplementary Table  
484 8)<sup>64</sup>. Old minor workers (FW) and 20-year old queens (QT4) and kings (KT4) were sampled  
485 from at least twenty-year-old colonies. Less than an hour was taken to reach the royal cells  
486 containing QT4 and KT4. We observed that habitacle volumes were comparable between  
487 colonies (data not shown), suggesting that the colonies were of the same age. QT4 and KT4  
488 also showed limited variability in weight and length between colonies.

## 489 **Establishment and maintenance of incipient termite colonies**

490 Imagoes were collected in Pretoria (South Africa) in 2016 and 2018 during the spring swarming  
491 flights (coordinates in supplementary Table 8). Mounds were covered with nets to retrieve  
492 imagoes. These were placed in large boxes preserving humidity and immediately transferred to  
493 the laboratory. Individuals were sexed by visual observation of their abdominal sternites,  
494 weight and length were recorded and wings were manually removed. Establishment of

495 laboratory incipient colonies occurred for both field trips, following a protocol adapted from  
496 Lepage<sup>32</sup> and Han & Bordereau<sup>33</sup> (and Supplementary Fig. 6). In October 2016 and 2018,  
497 imagoes were collected from five colonies each time (males from a single colony, females twice  
498 from four different ones). Per colony providing females (eight in total), 200 incipient colonies  
499 were established. Each paired couple was introduced in a closed plastic box (6 x 5 x 4.5 cm)  
500 filled with sieved soil collected near the mounds. The incipient colonies were kept in a breeding  
501 room with controlled conditions: 28°C, 85% relative humidity and 12:12 photoperiod. Water  
502 was used to keep the soil slightly moistened. Development of the colonies was visually  
503 monitored. At three months, when workers started to explore, small pieces of dry wild oats  
504 were supplied on the surface of the soil and wood was additionally supplied after 4.5 months.  
505 A *Termitomyces* sp. fungus comb with nodules was collected from one mature field colony and  
506 a small part of this comb was introduced in each box. After 3.5 months, mortality was 56% for  
507 the 2016 incipient colonies ( $\pm 15\%$  across field colonies of origin) and  $30 \pm 7\%$  for the 2018  
508 incipient colonies. When the termite populations outgrew their boxes, they were opened on one  
509 side and placed inside bigger ones (18 x 12 x 7.5 cm after 3 months, 36 x 24 x 14 cm after 14  
510 months, and 1000 x 70 x 40 cm after 21 months) filled with sieved moistened soil. Colonies  
511 were checked every two days to supply water and food if needed and to remove moldy food.  
512 Queens were sampled after 3 months (QT1) and 9 months (QT2) in colonies established from  
513 both trips, and after 31 months (QT3) for the 2016 mission. At QT1, the number of minor and  
514 major workers, soldiers, presoldiers, and larvae were counted in colonies where queens were  
515 sampled. At QT2, these were also counted and weight of the fungus measured.

## 516 **Species identity**

517 Total DNA was isolated from the head and the legs of one imago of each of the 9 colonies. PCR  
518 was performed using the cytochrome oxidase I gene primers: LCO 5'- GGT CAA CAA ATC  
519 ATA AAG ATA TTG G -3' and HCO 5'- TAA ACT TCA GGG TGA CCA AAA AAT CA -

520 3<sup>70</sup> and the 650-bp amplified fragment was sequenced and analyzed using the Barcode of Life  
521 Database identification system ([www.barcodinglife.org](http://www.barcodinglife.org)). Species identity of each colony was  
522 confirmed to be *M. natalensis*<sup>43</sup>.

523

#### 524 **Hemolymph and fat body collection**

525 Hemolymph and fat body were collected from cold-anesthetized individuals (FW, QT0, QT1,  
526 QT2, QT3 and QT4). A total of 85 FW were pooled in one hemolymph and fat body sample  
527 while ten QT1, QT2 or QT3 were pooled. We obtained eight samples except for QT3 (three  
528 samples). Hemolymph was collected under a binocular microscope with tapered glass Pasteur  
529 pipettes inserted in the membranous part just behind the head. The mean volume of hemolymph  
530 collected per individual was 0.5  $\mu$ L for FW, 1.5  $\mu$ L for QT0, QT1, QT2, 50  $\mu$ L for QT3, and 1  
531 mL for QT4. Hemolymph samples were collected in cryotubes, quickly frozen in liquid nitrogen  
532 and kept at -80°C until use.

533 Subsequently, termites were killed by decapitation and abdominal fat body was collected. For  
534 RNA and DNA extraction, the fat body was stored in a tube containing RNAlater buffer  
535 (Invitrogen) and kept at -80°C until use. For lipid and metabolite analyses, nitrogen-frozen fat  
536 bodies were crushed in a tube which was immediately frozen in liquid nitrogen and kept at -  
537 80°C until use. For ploidy analyses, fat body was collected from one individual, stored in a tube  
538 containing 200  $\mu$ L of Cycletest PLUS DNA Reagent Kit buffer (Becton Dickinson) and kept at  
539 -80°C until use.

540

541

## 542 **RNA profiling**

543 In the 2016 cohort (4 FW, 4 QT0, 4 QT1, 1 QT2, 3 QT3, 4 QT4 and 3 KT4) and 2018 cohort  
544 (2 QT2), total RNA was isolated from fat body samples using miRNeasy Micro kit (Qiagen)  
545 and RNase-free DNase according to the manufacturer's instructions (Qiagen). RNA-Seq  
546 library preparations were carried out from 500 ng total RNA using the TruSeq Stranded mRNA  
547 kit (Illumina, San Diego, CA, USA) which allows mRNA strand orientation (sequence reads  
548 occur in the same orientation as anti-sense RNA). Briefly, poly(A)<sup>+</sup> RNA was selected with  
549 oligo(dT) beads, chemically fragmented and converted into single-stranded cDNA using  
550 random hexamer priming. Then, the second strand was generated to create double-stranded  
551 cDNA. cDNA were 3'-adenylated and Illumina adapters added. Ligation products were PCR-  
552 amplified. All libraries were subjected to size profile analysis conducted by Agilent 2100  
553 Bioanalyzer (Agilent Technologies, Santa Clara, CA, USA) and qPCR quantification (MxPro,  
554 Agilent Technologies, Santa Clara, CA, USA) using the KAPA Library Quantification Kit for  
555 Illumina Libraries (KapaBiosystems, Wilmington, MA, USA), then sequenced using 150 bp  
556 paired end reads chemistry on a HiSeq 4000 Illumina sequencer (Illumina, San Diego, CA,  
557 USA). An Illumina filter was applied to remove the least reliable data from the analysis. The  
558 raw data were filtered to remove any clusters with too much intensity corresponding to bases  
559 other than the called base. Adapters and primers were removed on the whole read and low-  
560 quality nucleotides were trimmed from both ends (when quality value was lower than 20).  
561 Sequences between the second unknown nucleotide (N) and the end of the read were also  
562 removed.

## 563 *RNA-seq analyses*

564 RNAseq reads were mapped against the *M. natalensis* genome<sup>43</sup> using *hisat2* (version 2.1.0<sup>71</sup>)  
565 at default settings. Gene expression levels were then generated by counting reads mapping to

566 each gene of the *M. natalensis* genome (annotation version 2.3) using *htseq-count*<sup>72</sup>.  
567 Differential expression analyses were carried out in R (3.5.1) with the DESeq2 package<sup>73</sup>,  
568 comparing between all pairs of castes and queen stages, as well as comparing each caste and  
569 queen stage against all others. Genes were considered significantly differentially expressed if  
570 the adjusted *p*-value was less than 0.05. Principal component analyses (PCA) were also carried  
571 out within the DESeq2 package<sup>73</sup>. Counts were transformed using the  
572 *varianceStabilizingTransformation* function, and the PCA was calculated and plotted using the  
573 *plotPCA* function. This function carries out a PCA on the top 500 genes, based on variance. A  
574 weighted gene co-expression network (WGCN) was generated with these gene expression  
575 counts, using the R package WGCNA<sup>34</sup>. Normalized counts were extracted from the DESeq2  
576 data set with the *counts* function. These data were filtered for genes with zero variance or with  
577 missing values with the WGCNA function *goodSamplesGenes*. With the remaining 9631 genes,  
578 a signed WGCN was created using a soft power of 14, implementing the biweight  
579 midcorrelation calculation and setting the minimum module size to 30. Modules with a  
580 dissimilarity less than 0.5 were merged using the *mergeCloseModules* function. We related the  
581 expression profiles of the resulting nine modules to castes and queen stages by correlating  
582 (Pearson's *r*) the module eigengenes (first principal component of the expression matrix of each  
583 module) with a binary vector, containing 0s and 1s depending on the membership of each  
584 sample (FW, QT0, QT1, QT2, QT3, QT4 or KT4). A significant positive correlation signifies  
585 an overall upregulation while a negative correlation signifies a downregulation of expression  
586 within the module for a given caste or queen stage.

587 To visualize the WGCN, we first reduced the WGCN to include only the most highly  
588 connected nodes. We did this by retaining genes with a topological overlap of at least 0.2 with  
589 at least another gene, and by including the top 15 most connected genes within each module.  
590 This reduced WGCN (5823 genes) was exported to Cytoscape (version 3.8.0<sup>74</sup>) with the

591 *exportNetworkToCytoscape* function in WGCNA (threshold 0.15). In Cytoscape, the network  
592 was rendered using the Edge-weighted Spring Embedded Layout and nodes were colored by  
593 module membership or expression fold change. GO term enrichment analyses were carried out  
594 with topGO (version 2.34.0<sup>75</sup>), using the classic algorithm. Node size was set to 5, Fisher exact  
595 tests were applied, and we only kept GO terms that matched with 2 genes at least and with a *p*-  
596 value < 0.05.

597

### 598 **Analysis of ILPs**

599 Two ILP genes (Mnat\_00258 and Mnat\_03820) were found in the *M. natalensis* proteome  
600 based on orthology to ILPs in *D. melanogaster*. Orthology groups had been determined in a  
601 previous study<sup>76</sup> using orthoMCL<sup>77</sup>. We checked for further ILP genes within the genome by  
602 mapping the protein sequences of these two *M. natalensis* genes and eight known *D.*  
603 *melanogaster* ILPs (downloaded from NCBI; accessed February 2021) against the *M.*  
604 *natalensis* genome. This was carried out with exonerate (v 2.2.0<sup>78</sup>) using the protein2genome  
605 model at default settings. No further ILP copies were found but the annotations of the two *M.*  
606 *natalensis* genes were improved based on these exonerate alignments. ILP protein sequences  
607 from 16 further insects (*Aedes aegypti*, *Apis mellifera*, *Atta cephalotes*, *Acromyrmex echinator*,  
608 *Blattella germanica*, *Camponotus floridanus*, *Cryptotermes secundus*, *Ephemera Danica*,  
609 *Harpegnathos saltator* *Linepithema humile*, *Nasonia vitripennis*, *Pogonomyrmex barbatus*,  
610 *Rhodnius prolixus*, *Solenopsis invicta*, *Tribolium castaneum*, *Zootermopsis nevadensis* and  
611 *Strigamia maritima*) were extracted from the same orthology database and aligned with the *M.*  
612 *natalensis* and *D. melanogaster* sequences using MAFFT (v7.397<sup>79</sup>) with the E-INS-I strategy.  
613 A gene tree was constructed with FastTree (v. 2.1.10<sup>80</sup>) and visualized with iTOL<sup>81</sup>.

614

615

## 616 **Metabolomic analysis**

617 A volume of 20  $\mu\text{L}$  of hemolymph (from 2016 and 2018 experiments; 6 FW, 8 QT0, 7 QT1, 7  
618 QT2, 3 QT3 and 4 QT4 samples) was used to determine metabolic profiles obtained by gas  
619 chromatography coupled with mass spectrometry (GC-MS). We used the experimental  
620 procedure described in Khodayari *et al.*<sup>82</sup>, and adapted in Genitoni *et al.*<sup>83</sup>. Samples were  
621 homogenized in 450  $\mu\text{L}$  of ice-cold methanol/chloroform (2:1, v/v) before the addition of 300  
622  $\mu\text{L}$  of ultra-pure water. After they have been vigorously vortexed, the samples were centrifuged  
623 for 10 min at 4,000 g (4°C). Then, 100  $\mu\text{L}$  of the upper phase, which contains metabolites, was  
624 transferred to new glass vials (Thermofisher), speedvac dried at RT, and vials sealed with PTFE  
625 caps. The derivatization of the samples was conducted with a CTC CombiPAL autosampler  
626 (CTC Analytics AG, Zwingen, Switzerland), as described in Khodayari *et al.*<sup>82</sup>. The GC-MS  
627 platform consisted of an Agilent 7890B gas chromatograph coupled to a 5977B mass  
628 spectrometer. The injector was held at 250°C, and the temperature of the oven ranged from 70  
629 to 170°C at 5°C/min, from 170 to 280°C at 7°C/min, and from 280 to 320°C at 15°C/min; at  
630 the end of the temperature ramps, the oven remained at 320°C for 4 min. A 30 m fused silica  
631 column (HP5 MS 30 m, I.D. 0.25 mm, thickness 0.25  $\mu\text{m}$ , 5% Diphenyl / 95%  
632 dimethylpolysiloxane, Agilent Technologies) was used with helium as the gas carrier at 1 mL  
633 per min. The temperatures of the transfer line and ion source were 280 and 230°C, respectively.  
634 The split mode (split ratio: 2:1) was used for the injection of 1  $\mu\text{L}$  of each sample, and detection  
635 was realized by electronic impact (electron energy: 70 eV) in full scan mode. The peaks list  
636 was annotated based on their MS fragmentation patterns with MassHunter. Detected  
637 metabolites were identified, and calibration curves were used to calculate the concentration of  
638 each metabolite.

## 639 *Statistical analysis*

640 Permutational MANOVA<sup>84</sup> was used to test for differences in multivariate metabolite  
641 concentrations between stages and castes. We subsequently tested for differences in individual  
642 metabolites between pairs of subsequent stages or between FW vs. QT0 and FW vs. QT4. The  
643 concentrations of all metabolites were log transformed and compared between groups by using  
644 Welch tests. Tail probabilities were corrected for multiple testing using the Benjamini-  
645 Hochberg method. Tests were considered significant for a p-value < 0.05 and carried out using  
646 R software (v 3.6.3).

647

### 648 **Lipidomic analysis**

649 Lipids were extracted for fatty acid profile analysis gas chromatography with flame ionization  
650 detection (GC-FID) and gas chromatography coupled to mass spectrometry (GC-MS).  
651 Lipidomic analyses were done by liquid chromatography coupled to mass spectrometry (LC-  
652 HRMS/MS). Lipids were extracted from 20  $\mu$ L of hemolymph (from 4 FW and 4 QT4) or from  
653 fat body (from 4 QT0, 3 QT2 and 3 QT4) using a biphasic solvent system of cold methanol,  
654 methyl tert-butyl ether (MTBE), and water, adapted from Cajka *et al.*<sup>85</sup>. Briefly, the samples  
655 were transferred in 750  $\mu$ L of MTBE and 150  $\mu$ L of methanol into a 2 mL screw cap tube. For  
656 lipidomic analysis, 1 $\mu$ L of internal standard (PC 31: 1|PC17:0-PC14:1) at 3,775  $\mu$ g/mL was  
657 added to each sample. After homogenization with the "Precellys tissue homogenizer" at 5,000  
658 rpm for 5 minutes, 400  $\mu$ L of H<sub>2</sub>O was added to each sample. The samples were then  
659 centrifuged at 13,000 rpm for 5 min. The upper phase containing the lipids (MTBE) was  
660 transferred into a new tube and dried under a stream of nitrogen at 20°C. For fatty acid profile  
661 analysis, extracted lipids were transferred in 100  $\mu$ L of MTBE, methylated into fatty acids of  
662 methyl esters (FAMES) after the addition of 10  $\mu$ L of tetramethylammonium hydroxide  
663 (TMAH). After a centrifugation at 4,000 rpm during 5 min, supernatants were collected and



664 diluted 3 times into heptane prior to injection into GC-FID and GC-MS. For lipidomic analysis,  
665 lipids extracted were taken up into 100  $\mu$ L of isopropanol before injection into LC-HRMS/MS.

#### 666 *FAMES analysis*

667 Fatty acid profiles were separated and analyzed by a gas chromatography with flame ionization  
668 detection (GC-FID 2010 Plus Shimadzu) equipped with a BPX 70 capillary column (SGE,  
669 30 m  $\times$  0.25 mm, 0.25  $\mu$ m) as described in Merlier *et al.*<sup>86</sup>. The fatty acids were identified by  
670 comparison of the retention times of a standard solution of 37 fatty acid methyl esters (Sigma;  
671 47885-U Supelco) in GC-FID and confirmed by high accuracy mass of molecular ions and their  
672 fragments after injection into a GC-MS (Q-Exactive<sup>TM</sup>, Thermo)<sup>86</sup>. The composition of fatty  
673 acids was expressed as a relative percentage of their peak areas with respect to the total peak  
674 area of all the fatty acids. The fat body samples were normalized by dividing peak areas with  
675 total DNA concentration (ng/mL) measured with a Qubit Fluorometer (ThermoFisher) and  
676 Qubit dsDNA Assay kit (Invitrogen). The membrane peroxidation index (PI) of lipid extracts  
677 in fat bodies of queens was calculated as the sum of bis-allylic methylene groups per 100 fatty  
678 acids according to the equation<sup>57</sup> :

679  $PI = (\text{percentage of dienoics} \times 1) + (\text{percentage of trienoics} \times 2) + (\text{percentage of hexaenoics} \times 5)$

#### 680 *Untargeted lipidomics analysis*

681 The untargeted lipidomics analysis was conducted using a liquid chromatography-high  
682 resolution tandem mass spectrometry (LC-HRMS/MS) analysis used as described and modified  
683 from Ulmer *et al.*<sup>87</sup>. An HPLC 1290 (Agilent Technologies) coupled to a hybrid quadrupole  
684 time-of-flight high definition (QtoF) mass spectrometer Agilent 6538 (Agilent Technologies)  
685 equipped with an ESI dual source was used. Lipids were separated on a C18 Hypersil Gold  
686 (100  $\times$  2.1 mm, 1.9  $\mu$ m, ThermoFisher) at 50°C, using an elution gradient composed of a solution  
687 of 20 mM of ammonium acetate and 0.1% formic acid (ACN: H<sub>2</sub>O, 60:40, v/v) (solvent A) and

688 a solution of 20 mM of ammonium acetate and 0.1% formic acid (IPA: ACN:H<sub>2</sub>O, 90:8:2, v/v)  
689 (solvent B). Separation was conducted under the following gradient: 0–2 min from 32% (B),  
690 2–3 min from 32% to 40% (B), 3–8 min from 40% to 45% (B), 8–10 min from 45% to 50%  
691 (B), 10–16 min from 50% to 60% (B), 16–22 min from 60% to 70% (B), 22–28 min from 70%  
692 to 80% (B), 28–30 min from 80% to 99% (B), 30–31 min from 99% to 32% (B), 31–36 min  
693 from 32% to 32% (B). The flow rate was set at 250  $\mu$ L/min. Two  $\mu$ L of samples were injected.  
694 MS / MS spectra were acquired in positive mode and in negative mode in data dependent and  
695 MS<sup>2</sup> scans were performed on the sixth most intense ions. The source temperature, fragmentor  
696 and the skimmer were set up at 350°C, 150 V and 65 V, respectively. The acquisition was made  
697 in full scan mode between 100 m/z and 1700 m/z, with a scan of two spectra per second. Two  
698 internal references were used for in-run calibration of the mass spectrometer (121.0509,  
699 922.0098 in positive ion mode and 112.9856, 1033.9881 in negative ion mode). MassHunter  
700 B.07 software allowed us to control the parameters of the machine acquired.

#### 701 *Data processing and annotation*

702 MsDial v4.0 software<sup>88</sup> was used for data processing and annotation of lipids. The data  
703 collection was performed by fixing the MS1 and MS2 tolerance, at 0.01 Da and 0.025 Da,  
704 respectively. The peak detection was fixed at 1000 amplitude and a mass slice width at 0.1 Da.  
705 The deconvolution parameters correspond to a sigma window value at 0.5 and a MS/MS  
706 abundance cut off at 10 amplitude. Isotopic ions were kept until 0.5 Da. The peaks list was  
707 annotated based on their unique MS/MS fragmentation patterns using the in-built LipidBlast  
708 mass spectral library in MS-DIAL software. The accurate mass tolerance MS1 and MS2 were  
709 fixed -at 0.01 Da and 0.05 Da respectively. The identification score cut off was fixed at 80%.  
710 Lipids were normalized by the intensity of the internal standard (PC 31: 1|PC17:0-PC14:1).

711

712 *Statistical analysis for lipidomic data*

713 Permutational MANOVA<sup>84</sup> on ilr-transformed compositional data<sup>89</sup> was used to test for  
714 differences in SFA, MUFA and PUFA lipid content in hemolymph of FW and QT4. Similarly,  
715 to compare the percentages of SFA, MUFA, PUFA lipid content in fat bodies of different queen  
716 stages we used a permutational MANOVA followed by pairwise post-hoc perMANOVA  
717 comparisons of each stage with QT4 (Holm-Bonferroni correction for multiple comparisons).  
718 To compare log-transformed individual lipid values between FW and QT4, or between QT0,  
719 QT2 and QT4, Welch tests were used, corrected for multiple testing using the Benjamini-  
720 Hochberg method. To compare the peroxidation index (PI) in fat bodies of different queen  
721 stages we used Kruskal-Wallis test followed by Dunn's post hoc comparisons. All tests were  
722 considered significant for a p-value < 0.05 and were carried out using R software (v 4.0.2).  
723 Heatmaps were made using the heatmap function in the Metaboanalyst v 4.0. with Euclidean  
724 distance and clustering using Ward's method.

725

726 **Ploidy analysis**

727 Fat body from 2016 and 2018 cohort samples (4 QT0, 4 QT1, 3 QT2, 3 QT3 and 6 QT4) was  
728 processed by Flow Cytometric Analysis with a Cycletest PLUS DNA Reagent Kit (BD  
729 Biosciences, Le pont de Claix). All procedures were adapted from Nozaki & Matsuura<sup>39</sup>.  
730 Stained nuclei were analyzed for DNA-PI fluorescence using an Accuri C6 Flow Cytometer  
731 (BD Biosciences) at an excitation wavelength of 488 nm and a detector equipped with an 585/45  
732 bandpass filter. Approximately 1,000 cells were acquired for each measurement. Flow  
733 cytometric analyses were performed with the Accuri C6 software v1.0.264.21 (BD  
734 Biosciences). Debris were removed on an FSC-A/SSC-A dotplot and doublet were eliminated  
735 with and PI-FL2-H/ FL2-A dot plot. The nuclei were analyzed with a histogram PI-A. The 1C

736 DNA peak was determined by the analysis of king's testis (sperm), allowing the identification  
737 of the 2C, 4C, and 8C peaks of the others samples.

### 738 *Statistical analysis for ploidy*

739 To compare percentages of nuclei with different multiples of haploid genomes between queen  
740 stages, we used permutational MANOVA followed by pairwise post-hoc perMANOVA (Holm-  
741 Bonferroni correction for multiple comparisons).

742

### 743 **Acknowledgements**

744 The authors would like to thank Dr Christian Bordereau and Dr Jannette Mitchell for helpful  
745 discussions on the termite model. The authors acknowledge the Department of Public Works  
746 and Infrastructure, Pretoria and the University of Pretoria for allowing access to their sites of  
747 collect of *M. natalensis*. The authors also thank Cyril Fresillon and Pierre Deparscau,  
748 photographers for the CNRS images. We thank Qi Li for termite colony maintenance. This  
749 study was supported by the International Human Frontier Science Program RGP0060/2018 to  
750 M.V.C. S.S was also supported by a fellowship from Université de Paris Est-Créteil (UPEC).  
751 A.L. acknowledges financial support from France Génomique (ANR-10-INBS-09-08). We  
752 would like to thank the EcoChim platform of University of Rennes for access to metabolomics  
753 facilities.

754

### 755 **Author contributions**

756 M.V.C designed the study. D.S-D., A.R., R.L., L-A.P., Z.W.D.B., and M.V.C. carried out  
757 termite experiments, M.V.C and A.L. transcriptomic, D.R. and R.L. metabolomic and S.A. and  
758 R.L. lipidomic experiments. M.A. and M.V.C. measured DNA contents. S.S., M.H., T.V.D

759 and M.V.C. analyzed the data, wrote the original draft and were responsible for the figures and  
760 tables presented. All authors contributed with expertise, input, and edits throughout the text.

761

### 762 **Competing interests**

763 The authors declare that they have no conflict of interest.

764

### 765 **Data availability**

766 The authors declare that all data supporting the findings of this study are available within the  
767 paper and supplementary information files, or are available from a dedicated github repository:  
768 [https://github.com/MCH74/Mnat\\_analyses](https://github.com/MCH74/Mnat_analyses). RNA-seq reads generated in this study are  
769 available in Sequence Read Archive (BioProject ID: PRJNA685589 and BioSample  
770 accessions: SAMN17088123- SAMN17088147).

771

### 772 **Additional informations**

773 Supplementary Information accompanies this paper.

774

775 **REFERENCES**

- 776 1. Johnson, A. A. & Stolzing, A. The role of lipid metabolism in aging, lifespan regulation,  
777 and age-related disease. *Aging Cell* **18**, e13048 (2019).
- 778 2. Balaban, R. S., Nemoto, S. & Finkel, T. Mitochondria, oxidants, and aging. *Cell* **120**,  
779 483–495 (2005).
- 780 3. Flatt, T. Survival costs of reproduction in *Drosophila*. *Experimental Gerontology* **46**,  
781 369–375 (2011).
- 782 4. Kirkwood, T. B. L. Evolution of ageing. *Nature* **270**, 301–304 (1977).
- 783 5. Kirkwood, T. B. L. & Austad, S. N. Why do we age? *Nature* **408**, 233–238 (2000).
- 784 6. Maklakov, A. A. *et al.* Antagonistically pleiotropic allele increases lifespan and late-life  
785 reproduction at the cost of early-life reproduction and individual fitness. *Proceedings of*  
786 *the Royal Society B: Biological Sciences* **284**, 20170376 (2017).
- 787 7. Williams, G. C. Natural Selection, the Costs of Reproduction, and a Refinement of  
788 Lack's Principle. *The American Naturalist* **100**, 687–690 (1966).
- 789 8. Edward, D. A. & Chapman, T. Mechanisms underlying reproductive trade-offs: Costs  
790 of reproduction. *Mechanisms of Life History Evolution* (Oxford University Press, 2011).
- 791 9. Hansen, M., Flatt, T. & Aguilaniu, H. Reproduction, fat metabolism, and life span: What  
792 Is the Connection? *Cell Metabolism* **17**, 10–19 (2013).
- 793 10. Taormina, G. *et al.* Longevity: Lesson from model organisms. *Genes* **10**, 518 (2019).
- 794 11. Carey, J. R. Demographic mechanisms for the evolution of long life in social insects.  
795 *Experimental Gerontology* **36**, 713–722 (2001).
- 796 12. Traniello, J. F. A. & Leuthold, R. H. Behavior and ecology of foraging in termites. In  
797 *Termites: Evolution, Sociality, Symbioses, Ecology* (eds. Abe, T., Bignell, D. E. &  
798 Higashi, M.) 141–168 (Springer Netherlands, 2000).
- 799 13. Keller, L. & Genoud, M. Extraordinary lifespans in ants: a test of evolutionary theories  
800 of ageing. *Nature* **389**, 958–960 (1997).
- 801 14. Kaib, M., Hacker, M. & Brandl, R. Egg-laying in monogynous and polygynous colonies  
802 of the termite *Macrotermes michaelseni* (Isoptera, Macrotermitidae). *Insectes soc* **48**,  
803 231–237 (2001).
- 804 15. Kuhn, J. M. M., Meusemann, K. & Korb, J. Disentangling the aging network of a termite  
805 queen. Preprint at <https://www.biorxiv.org/content/10.1101/2020.12.19.423576v1>  
806 (2020).
- 807 16. Rodrigues, M. A. & Flatt, T. Endocrine uncoupling of the trade-off between  
808 reproduction and somatic maintenance in eusocial insects. *Current Opinion in Insect*  
809 *Science* **16**, 1–8 (2016).
- 810 17. von Wyszczki, K., Rueppell, O., Oettler, J. & Heinze, J. Transcriptomic signatures  
811 mirror the lack of the fecundity/longevity trade-off in ant queens. *Molecular Biology*  
812 *and Evolution* **32**, 3173–3185 (2015).
- 813 18. Heinze, J. & Schrempf, A. Aging and reproduction in social insects – A Mini-Review.  
814 *GER* **54**, 160–167 (2008).
- 815 19. Harrison, M. C. *et al.* Gene co-expression network reveals highly conserved, well-  
816 regulated anti-ageing mechanisms in old ant queens. *Genome Biology and Evolution*  
817 (2021).
- 818 20. Korb, J. *et al.* Comparative transcriptomic analysis of the mechanisms underpinning  
819 ageing and fecundity in social insects. *Philosophical Transactions of the Royal Society*  
820 *B: Biological Sciences* **376**, 20190728 (2021).
- 821 21. Lin, S., Werle, J. & Korb, J. Transcriptomic analyses of the termite, *Cryptotermes*  
822 *secundus*, reveal a gene network underlying a long lifespan and high fecundity.  
823 *Communications Biology* **4**, 1–12 (2021).

- 824 22. Haroon *et al.* Transcriptomic evidence that insulin signalling pathway regulates the  
825 ageing of subterranean termite castes. *Scientific Reports* **10**, 8187 (2020).
- 826 23. Pan, H. & Finkel, T. Key proteins and pathways that regulate lifespan. *Journal of*  
827 *Biological Chemistry* **292**, 6452–6460 (2017).
- 828 24. Teleman, A. A. Molecular mechanisms of metabolic regulation by insulin in  
829 *Drosophila*. *Biochemical Journal* **425**, 13–26 (2009).
- 830 25. Bjedov, I. *et al.* Mechanisms of life span extension by rapamycin in the fruit fly  
831 *Drosophila melanogaster*. *Cell Metabolism* **11**, 35–46 (2010).
- 832 26. Partridge, L., Alic, N., Bjedov, I. & Piper, M. D. W. Ageing in *Drosophila*: the role of  
833 the insulin/Igf and TOR signalling network. *Experimental Gerontology* **46**, 376–381  
834 (2011).
- 835 27. Giannakou, M. E. *et al.* Long-lived *Drosophila* with overexpressed dFOXO in adult fat  
836 body. *Science* **305**, 361–361 (2004).
- 837 28. Fontana, L. & Partridge, L. Promoting health and longevity through diet: from model  
838 organisms to humans. *Cell* **161**, 106–118 (2015).
- 839 29. Álvarez-Rendón, J. P., Salceda, R. & Riesgo-Escovar, J. R. *Drosophila melanogaster*  
840 as a model for diabetes type 2 progression. *BioMed Research International* vol. 2018  
841 (2018).
- 842 30. Arrese, E. L. & Soulages, J. L. Insect fat body: energy, metabolism, and regulation.  
843 *Annu. Rev. Entomol.* **55**, 207–225 (2009).
- 844 31. Li, S., Yu, X. & Feng, Q. Fat body biology in the last decade. *Annual Review of*  
845 *Entomology* **64**, 315–333 (2019).
- 846 32. Lepage, M. Development in the laboratory of incipient colonies of *Macrotermes*  
847 *michaelseni* (Sjoestedt) (Isoptera, Macrotermitidae). *Annales de la Societe*  
848 *Entomologique de France* (1990).
- 849 33. Han, S. H. (Universite d'Abidjan & Bordereau, C. From colony foundation to dispersal  
850 flight in a higher fungus-growing termite, *Macrotermes subhyalinus*, (Isoptera,  
851 Macrotermitinae). *Sociobiology (USA)* (1992).
- 852 34. Langfelder, P. & Horvath, S. WGCNA: an R package for weighted correlation network  
853 analysis. *BMC Bioinformatics* **9**, 559 (2008).
- 854 35. Brina, D. *et al.* eIF6 coordinates insulin sensitivity and lipid metabolism by coupling  
855 translation to transcription. *Nature Communications* **6**, 8261 (2015).
- 856 36. Buszczak, M., Lu, X., Segraves, W. A., Chang, T. Y. & Cooley, L. Mutations in the  
857 *midway* gene disrupt a *Drosophila* Acyl Coenzyme A: Diacylglycerol Acyltransferase.  
858 *Genetics* **160**, 1511–1518 (2002).
- 859 37. Wang, Y., Viscarra, J., Kim, S.-J. & Sul, H. S. Transcriptional regulation of hepatic  
860 lipogenesis. *Nature Reviews Molecular Cell Biology* **16**, 678–689 (2015).
- 861 38. Han, S. H. & Bordereau, C. Origin and formation of the royal fat body of the higher  
862 termite queens. *J. Morphol.* **173**, 17–28 (1982).
- 863 39. Nozaki, T. & Matsuura, K. Evolutionary relationship of fat body endoreduplication and  
864 queen fecundity in termites. *Ecology and Evolution* **9**, 11684–11694 (2019).
- 865 40. Herzig, S. & Shaw, R. J. AMPK: guardian of metabolism and mitochondrial  
866 homeostasis. *Nature Reviews Molecular Cell Biology* **19**, 121–135 (2018).
- 867 41. Jeon, S.-M. Regulation and function of AMPK in physiology and diseases. *Exp Mol*  
868 *Med* **48**, e245 (2016).
- 869 42. Thompson, S. N.. Trehalose—the insect ‘blood’ sugar. *Advances in insect*  
870 *physiology*, Vol 31, 205-285. (Elsevier, 2003).
- 871 43. Poulsen, M. *et al.* Complementary symbiont contributions to plant decomposition in a  
872 fungus-farming termite. *PNAS* **111**, 14500–14505 (2014).
- 873 44. Lee, D., Son, H. G., Jung, Y. & Lee, S.-J. V. The role of dietary carbohydrates in



- 874 organismal aging. *Cellular and Molecular Life Sciences* **74**, 1793–1803 (2017).
- 875 45. Musselman, L. P. *et al.* A high-sugar diet produces obesity and insulin resistance in  
876 wild-type *Drosophila*. *Disease Models & Mechanisms* **4**, 842–849 (2011).
- 877 46. Larsen, W. J. Cell remodeling in the fat body of an insect. *Tissue and Cell* **8**, 73–92  
878 (1976).
- 879 47. Kamakura, M. Royalactin induces queen differentiation in honeybees. *Nature* **473**, 478–  
880 483 (2011).
- 881 48. Ristow, M. & Schmeisser, K. Mitohormesis: Promoting health and lifespan by increased  
882 levels of reactive oxygen species (ROS). *Dose-Response* **12**, dose-response.13-  
883 035.Ristow (2014).
- 884 49. Corona, M., Hughes, K. A., Weaver, D. B. & Robinson, G. E. Gene expression patterns  
885 associated with queen honey bee longevity. *Mechanisms of Ageing and Development*  
886 **126**, 1230–1238 (2005).
- 887 50. Parker, J. D., Parker, K. M., Sohal, B. H., Sohal, R. S. & Keller, L. Decreased expression  
888 of Cu–Zn superoxide dismutase 1 in ants with extreme lifespan. *PNAS* **101**, 3486–3489  
889 (2004).
- 890 51. Slaidina, M., Delanoue, R., Gronke, S., Partridge, L. & Léopold, P. A *Drosophila*  
891 *Insulin-like Peptide* Promotes Growth during Nonfeeding States. *Developmental Cell*  
892 **17**, 874–884 (2009).
- 893 52. Bai, H., Kang, P. & Tatar, M. *Drosophila insulin-like peptide-6 (dilp6)* expression from  
894 fat body extends lifespan and represses secretion of *Drosophila insulin-like peptide-2*  
895 from the brain. *Aging Cell* **11**, 978–985 (2012).
- 896 53. Wang, Y., Azevedo, S. V., Hartfelder, K. & Amdam, G. V. Insulin-like peptides  
897 (AmILP1 and AmILP2) differentially affect female caste development in the honey bee  
898 (*Apis mellifera* L.). *Journal of Experimental Biology* **216**, 4347–4357 (2013).
- 899 54. Poitout, V. *et al.* Regulation of the insulin gene by glucose and fatty acids. *The Journal*  
900 *of Nutrition* **136**, 873–876 (2006).
- 901 55. Miluzio, A. *et al.* Translational control by mTOR-independent routes: how eIF6  
902 organizes metabolism. *Biochem Soc Trans* **44**, 1667–1673 (2016).
- 903 56. Wang, X. & Proud, C. G. Nutrient control of TORC1, a cell-cycle regulator. *Trends in*  
904 *Cell Biology* **19**, 260–267 (2009).
- 905 57. Martin, N. *et al.* Honey bee caste lipidomics in relation to life-history stage and the long  
906 life of the queen. *Journal of Experimental Biology* **222**, (2019).
- 907 58. Munro, D. & Blier, P. U. The extreme longevity of *Arctica islandica* is associated with  
908 increased peroxidation resistance in mitochondrial membranes. *Aging Cell* **11**, 845–855  
909 (2012).
- 910 59. Kuhnlein, R. P. Lipid droplet-based storage fat metabolism in *Drosophila*. *J. Lipid Res.*  
911 jlr. R024299 (2012).
- 912 60. Gilbert, L. I. & Chino, H. Transport of lipids in insects. *J. Lipid Res.* **15**, 439–456 (1974).
- 913 61. Gems, D. & Partridge, L. Genetics of longevity in model organisms: debates and  
914 paradigm shifts. *Annu. Rev. Physiol.* **75**, 621–644 (2013).
- 915 62. De Fine Licht, H. H., Andersen, A. & Aanen, D. K. *Termitomyces* sp. associated with  
916 the termite *Macrotermes natalensis* has a heterothallic mating system and multinucleate  
917 cells. *Mycological Research* **109**, 314–318 (2005).
- 918 63. Uys, V. M. & Plant Protection Research Institute (South Africa). *A guide to the termite*  
919 *genera of Southern Africa* No. 15. (Plant Protection Research Institute, Agricultural  
920 Research Council, 2002).
- 921 64. Mitchell, J. D. Colony Foundation and the development of incipient laboratory colonies  
922 of *Macrotermes natalensis* (Haviland) (Termitidae: Macrotermitinae). *afen* **28**, 215–224  
923 (2020).



- 924 65. Sillam-Dussès, D. *Trail pheromones and sex pheromones in termites*. (Nova Science  
925 Publishers/Novinka, 2010).
- 926 66. Licht, H. H. D. F., Boomsma, J. J. & Aanen, D. K. Presumptive horizontal symbiont  
927 transmission in the fungus-growing termite *Macrotermes natalensis*. *Molecular Ecology*  
928 **15**, 3131–3138 (2006).
- 929 67. Roisin, Y. Diversity and Evolution of Caste Patterns. In *Termites: Evolution, Sociality,*  
930 *Symbioses, Ecology* (eds. Abe, T., Bignell, D. E. & Higashi, M.) 95–119 (Springer  
931 Netherlands, 2000).
- 932 68. Noirot, Ch. The Caste System in Higher Termites. In *Caste Differentiation in Social*  
933 *Insects* Ch. 6 (eds. Watson, J. A. L., Okot-kotber, B. M. & Noirot, CH.) 75–86  
934 (Pergamon, 1985).
- 935 69. Keller, L. Queen lifespan and colony characteristics in ants and termites. *Insectes soc.*  
936 **45**, 235–246 (1998).
- 937 70. Folmer, O., Black, M., Hoeh, W., Lutz, R. & Vrijenhoek, R. DNA primers for  
938 amplification of mitochondrial cytochrome c oxidase subunit 1 from diverse metazoan  
939 invertebrates. *Molecular Marine Biology and Biotechnology* (1994).
- 940 71. Kim, D., Paggi, J. M., Park, C., Bennett, C. & Salzberg, S. L. Graph-based genome  
941 alignment and genotyping with HISAT2 and HISAT-genotype. *Nature Biotechnology*  
942 **37**, 907–915 (2019).
- 943 72. Anders, S., Pyl, P. T. & Huber, W. HTSeq—a Python framework to work with high-  
944 throughput sequencing data. *Bioinformatics* **31**, 166–169 (2015).
- 945 73. Love, M. I., Huber, W. & Anders, S. Moderated estimation of fold change and  
946 dispersion for RNA-seq data with DESeq2. *Genome Biol* **15**, 550 (2014).
- 947 74. Shannon, P. *et al.* Cytoscape: A Software environment for integrated models of  
948 biomolecular interaction networks. *Genome Res.* **13**, 2498–2504 (2003).
- 949 75. Alexa, A. & Rahnenfuhrer, J. topGO: Enrichment analysis for Gene Ontology. R  
950 package version 2.28.0. *BioConductor*. *Published online* (2016).
- 951 76. Harrison, M. C. *et al.* Hemimetabolous genomes reveal molecular basis of termite  
952 eusociality. *Nature Ecology & Evolution* **2**, 557–566 (2018).
- 953 77. Li, L., Stoeckert, C. J. & Roos, D. S. OrthoMCL: Identification of ortholog groups for  
954 eukaryotic genomes. *Genome Res.* **13**, 2178–2189 (2003).
- 955 78. Slater, G. S. C. & Birney, E. Automated generation of heuristics for biological sequence  
956 comparison. *BMC Bioinformatics* **6**, 31 (2005).
- 957 79. Katoh, K. & Standley, D. M. MAFFT Multiple sequence alignment software version 7:  
958 improvements in performance and usability. *Molecular Biology and Evolution* **30**, 772–  
959 780 (2013).
- 960 80. Price, M. N., Dehal, P. S. & Arkin, A. P. FastTree: Computing large minimum evolution  
961 trees with profiles instead of a distance matrix. *Molecular Biology and Evolution* **26**,  
962 1641–1650 (2009).
- 963 81. Letunic, I. & Bork, P. Interactive Tree Of Life (iTOL) v4: recent updates and new  
964 developments. *Nucleic Acids Res* **47**, W256–W259 (2019).
- 965 82. Khodayari, S., Moharramipour, S., Larvor, V., Hidalgo, K. & Renault, D. Deciphering  
966 the metabolic changes associated with diapause syndrome and cold acclimation in the  
967 two-spotted spider mite *tetranychus urticae*. *PLOS ONE* **8**, e54025 (2013).
- 968 83. Genitoni, J. *et al.* Hypomethylation of the aquatic invasive plant, *Ludwigia grandiflora*  
969 subsp. *hexapetala* mimics the adaptive transition into the terrestrial morphotype.  
970 *Physiologia Plantarum* **170**, 280–298 (2020).
- 971 84. McArdle, B. H. & Anderson, M. J. Fitting multivariate models to community data: a  
972 comment on distance-based redundancy analysis. *Ecology* **82**, 290–297 (2001).
- 973 85. Cajka, T., Smilowitz, J. T. & Fiehn, O. Validating quantitative untargeted lipidomics

- 974 across nine liquid chromatography–high-resolution mass spectrometry platforms. *Anal.*  
975 *Chem.* **89**, 12360–12368 (2017).
- 976 86. Merlier, F., Imatoukene, N., Octave, S., Nicaud, J.-M. & Thomasset, B. A gas  
977 chromatography full scan high resolution Orbitrap mass spectrometry method for  
978 separation and characterization of 3-hydroxymethyl pyridine ester of fatty acids at low  
979 levels. *Journal of Chromatography A* **1575**, 72–79 (2018).
- 980 87. Ulmer, C. Z., Patterson, R. E., Koelmel, J. P., Garrett, T. J. & Yost, R. A. A Robust  
981 Lipidomics workflow for mammalian cells, plasma, and tissue using liquid-  
982 chromatography high-resolution tandem mass spectrometry. in *Lipidomics: Methods*  
983 *and Protocols* (ed. Bhattacharya, S. K.) 91–106 (Springer, 2017).
- 984 88. Tsugawa, H. *et al.* A lipidome atlas in MS-DIAL 4. *Nature Biotechnology* **38**, 1159–  
985 1163 (2020).
- 986 89. Van den Boogaart, K. G., & Tolosana-Delgado, R. *Analyzing compositional data with*  
987 *R* Vol. 122 (Heidelberg: Springer 2013).  
988

989 **FIGURE LEGENDS**

990 **Figure 1: Overview of the model system. (a)** Timeline of the different stages of *Macrotermes*  
991 *natalensis* colonies founded from one male and one female imago each (T0). Queens from  
992 incipient laboratory colonies were sampled at 3 months after colony establishment (T1), 9  
993 months (T2) and 31 months (T3). Field termite colonies over 20 years old are added. From field  
994 colonies, queens, workers and kings were sampled. Wild oats were supplied to the laboratory  
995 colonies from 3 months onward and the fungus *Termitomyces sp.* was introduced artificially in  
996 3.5 months old colonies. Wood was supplied from 4.5 months onward. The drawings represent  
997 winged imagoes, workers, kings and queens at the different stages (physogastric queens become  
998 larger). Replication and sampling in our incipient colonies is further described in  
999 Supplementary Table 9. **(b)** Principal component analyses (PCAs) of gene expression across  
1000 25 samples, spanning 6 colonies, 3 castes and 5 queen stages (FW, QT0, QT1, QT2, QT3, QT4,  
1001 KT4). Scores for the two main PCs are shown for all data (left) and among reproductives (i.e.,  
1002 without FW; right). **(c)** Weighted Gene Co-expression Network analysis (WGCN). Nine  
1003 modules were detected, each represented by a color (rows). In the left-hand heatmap correlation  
1004 coefficients and *p*-values are shown, relating gene expression (first major axis of the expression  
1005 matrix) of each module to each caste and queen stage (columns). Positive correlations are red  
1006 and negative correlations are blue; significant correlation values ( $p < 0.05$ ) have a green border.  
1007 Module size is also shown, reflecting the number of genes assigned to each module. Module  
1008 expression profiles show mean expression of each module within each caste and queen stage.  
1009 Enriched GO-terms of each module are displayed as tag-clouds, in which font size is inversely  
1010 related to *p*-value. A visualization of the network is displayed on the right with nodes colored  
1011 by their module membership. This network was created with Cytoscape (version 3.8.0) on a  
1012 reduced representation of the WGCN containing the top connected genes.

1013

1014 **Figure 2: Caste related changes in gene expression.** Heatmap representing standardized gene  
1015 expression (blue = low; red = high) in fat bodies of FW, QT4 and KT4. Annotations to the right  
1016 of the heatmap include WGCN module (Fig. 1), gene names and gene acronyms in *Drosophila*  
1017 *melanogaster* (right) and *Homo sapiens* (left). The map is restricted to expression of genes  
1018 involved in metabolic signaling, lipid metabolism, mitochondrial oxidative phosphorylation  
1019 system (OXPHOS), mitochondrial ribosome (mt-ribo), mitochondrial fission (mt-fission),  
1020 mitochondrial transport (mt-transport), antioxidant defense (AO-def) and DNA repair.  
1021 Expression of all genes differ significantly between FW versus QT4 and between FW versus  
1022 KT4. The number of replicates per group is provided in Supplementary Table 9.

1023  
1024 **Figure 3: Cytoscape during adult queen maturation.** Changes of gene expression within the  
1025 gene co-expression network (GCN) with queen differentiation. Node color represents the  
1026 standardized gene expression within each queen stage (low=blue: high=red). Genes that are  
1027 significantly up- or down-regulated at each queen stage have a strong, black border. Enriched  
1028 GO-terms within each group of up- or down-regulated genes are displayed as tag clouds below  
1029 each network.

1030  
1031 **Figure 4: Heatmap with the expression of genes in fat bodies during adult queen**  
1032 **maturity involved in lipid metabolism.** Heatmap representing standardized gene  
1033 expression (blue = low; red = high) at each of the five queen stages (QT0-QT4). Annotations  
1034 to the right of the heatmap include WGCN module (Fig. 1), gene name and gene acronyms in  
1035 *Drosophila melanogaster* (right) and *Homo sapiens* (left). Number of replicates per group is  
1036 provided in Supplementary Table 9. Greater than or less than symbols (>/<) represent  
1037 significant differences in expression.

1038 **Figure 5: Changes in DNA content of fat body cells during adult queen sexual maturation.**

1039 Percentages of nuclear 2C, 4C and 8C cells in the fat bodies of queens in different stages (QT0  
1040 to QT4). The ternary graph shows the actual data points with stages distinguished by a colour  
1041 code. The table lists per stage the average percentages of 2C, 4C, 8C. Number of replicates per  
1042 group are provided in Supplementary Table 9. The proportions of cells with different DNA  
1043 content differ between stages (compositional perMANOVA,  $p = 0.001$ ), and in particular stages  
1044 QT0 and QT2 differ from QT4 (post-hoc perMANOVA, both  $p = 0.02$ ).

1045

1046 **Figure 6: Canonical discriminant analysis of concentrations of metabolites.** Three  
1047 canonical functions discriminate ages and castes significantly, of which we show scores for the  
1048 first two. Average scores for each caste and age are shown, plus canonical structure coefficients  
1049 of each metabolite as vectors from the origin. These are proportional in length to the magnitudes  
1050 of the correlations of each metabolite with the scores of the discriminant functions and show  
1051 how information from each metabolite aids in discriminating castes and ages. Numbers of  
1052 replicates per group are provided in Supplementary Table 9.

1053

1054 **Figure 7: Comparison of lipid profiles between FW and QT4 in hemolymph. (a)**

1055 Hierarchical clustering heatmap analysis of triglycerides (TG, orange), diglycerides (DG,  
1056 green), phosphatidylethanolamine (PE, black), phosphatidylcholine (PC, grey),  
1057 lysophosphatidylcholine (LPC, yellow), sphingomyelin (SM, blue) lipids in hemolymph of FW  
1058 and QT4 performed in MetaboAnalyst 4.0. Individual lipids are shown in rows and samples  
1059 displayed in columns, according to cluster analysis (Euclidian distance was used and Ward's  
1060 clustering algorithm). Each colored cell on the heatmap plot corresponds to a normalized lipid  
1061 amount above (red) or below (blue) the mean concentration for a given lipid. **(b)** Fatty acid  
1062 percentages in hemolymph of FW and QT4. Percentage (%) of saturated fatty acids (SFA),

1063 monounsaturated fatty acids (MUFA) and polyunsaturated fatty acids (PUFA) of total FA in  
1064 hemolymph. Ternary graph showing the percentage of SFA (orange), MUFA (black) and PUFA  
1065 (blue). A permutational MANOVA found that SFA/MUFA/PUFA proportions in hemolymph  
1066 were not significant different between FW and QT4. Numbers of replicates per group are  
1067 provided in Supplementary Table 9.

1068

1069 **Figure 8: Changes in lipid profiles in fat bodies during adult queen maturation. (a)**

1070 Hierarchical clustering heatmap analysis of triglycerides (TG, orange), diglycerides (DG,  
1071 green), phosphatidylethanolamine (PE, black), phosphatidylcholine (PC, grey),  
1072 lysophosphatidylcholine (LPC, yellow), sphingomyelin (SM, blue) lipids in fat body of  
1073 different stage of queen (QT0, QT2 and QT4) performed in MetaboAnalyst 4.0. Individual  
1074 lipids are shown per row and mean of lipid amount of each stage displayed in columns,  
1075 according to cluster analysis (Euclidean distance and Ward's algorithm). Each colored cell on  
1076 the heatmap plot corresponds to a normalized lipid amount above (red) or below (blue) the  
1077 mean concentrations for a given lipid. **(b)** Fatty acid percentages of different queen maturation  
1078 stages (QT0, QT2, QT4) in fat body. Percentage (%) of saturated fatty acids (SFA),  
1079 monounsaturated fatty acids (MUFA) and polyunsaturated fatty acids (PUFA) of total FA in  
1080 fat body. Ternary graph showing the percentage of SFA (orange), MUFA (black) and PUFA  
1081 (blue). The table below shows the averages of MUFA, SFA and PUFA for each stage.  
1082 Permutational MANOVA demonstrated that SFA/MUFA/PUFA proportions in fat bodies of  
1083 QT2 and QT4 were significantly different relative to QT0 (Permutational MANOVA, p-value  
1084 = 0.012). **(c)** Box plot illustrating the peroxidation index of fat bodies of different queen  
1085 maturation stages (QT0, QT2 and QT4). A box consists of upper and lower hinges and a center  
1086 line corresponding to the 25th percentile, the 75th percentile and the median, respectively.  
1087 Rhombuses represent the averages. Different letters indicate significantly different values

1088 according to a Kruskal-Wallis test followed by Dunn tests. Statistical differences are given for  
1089  $p < 0.05$ . Number of replicates per group are provided in Supplementary Table 9.



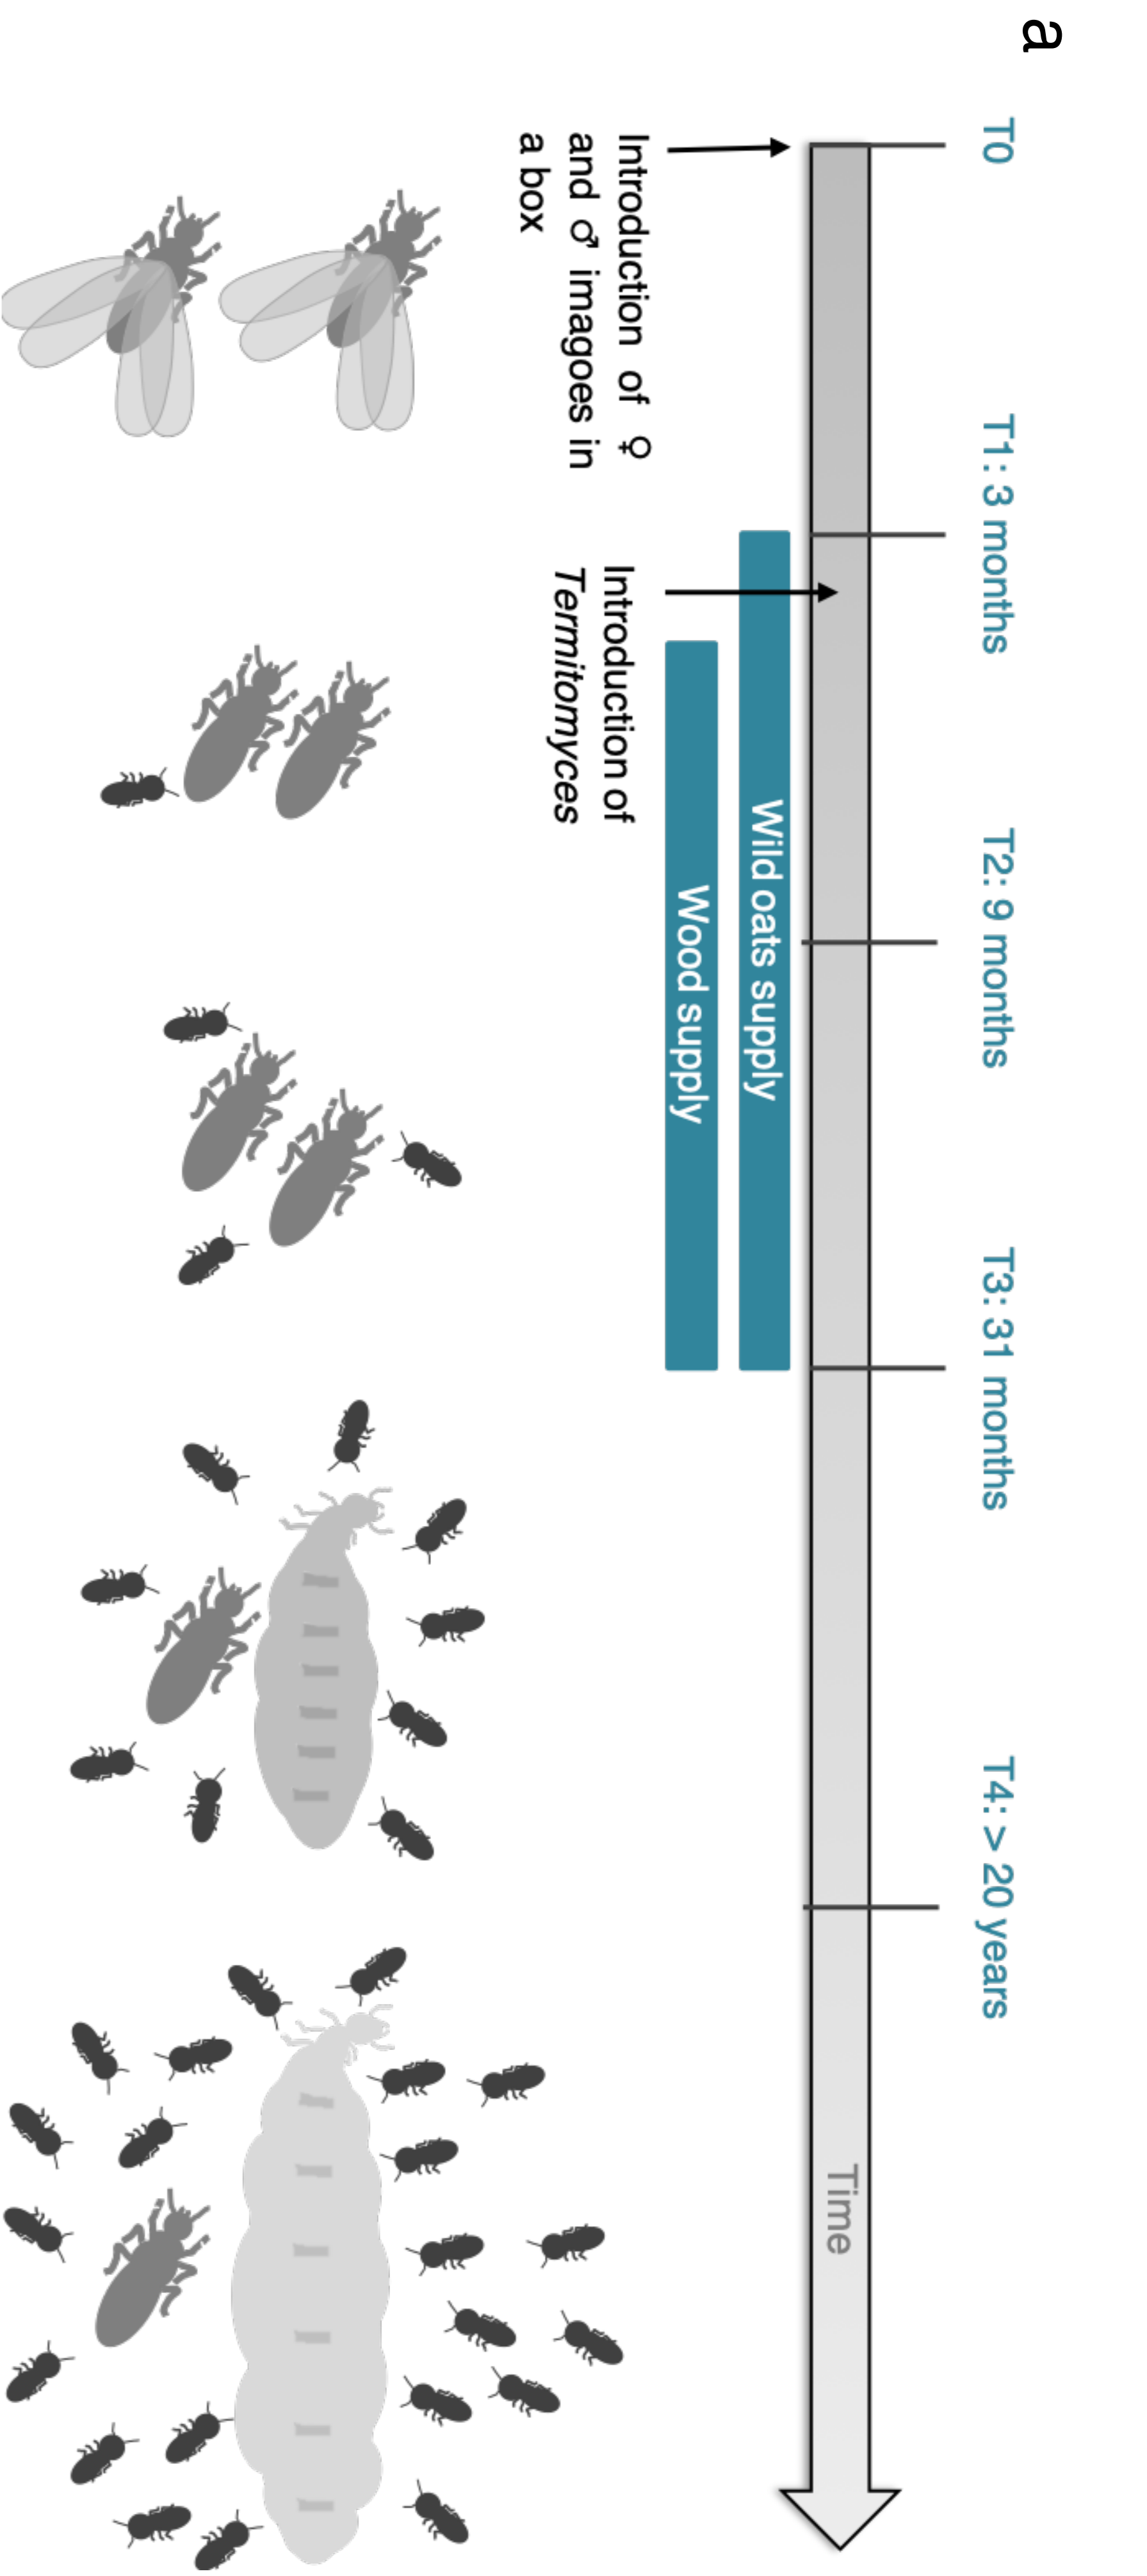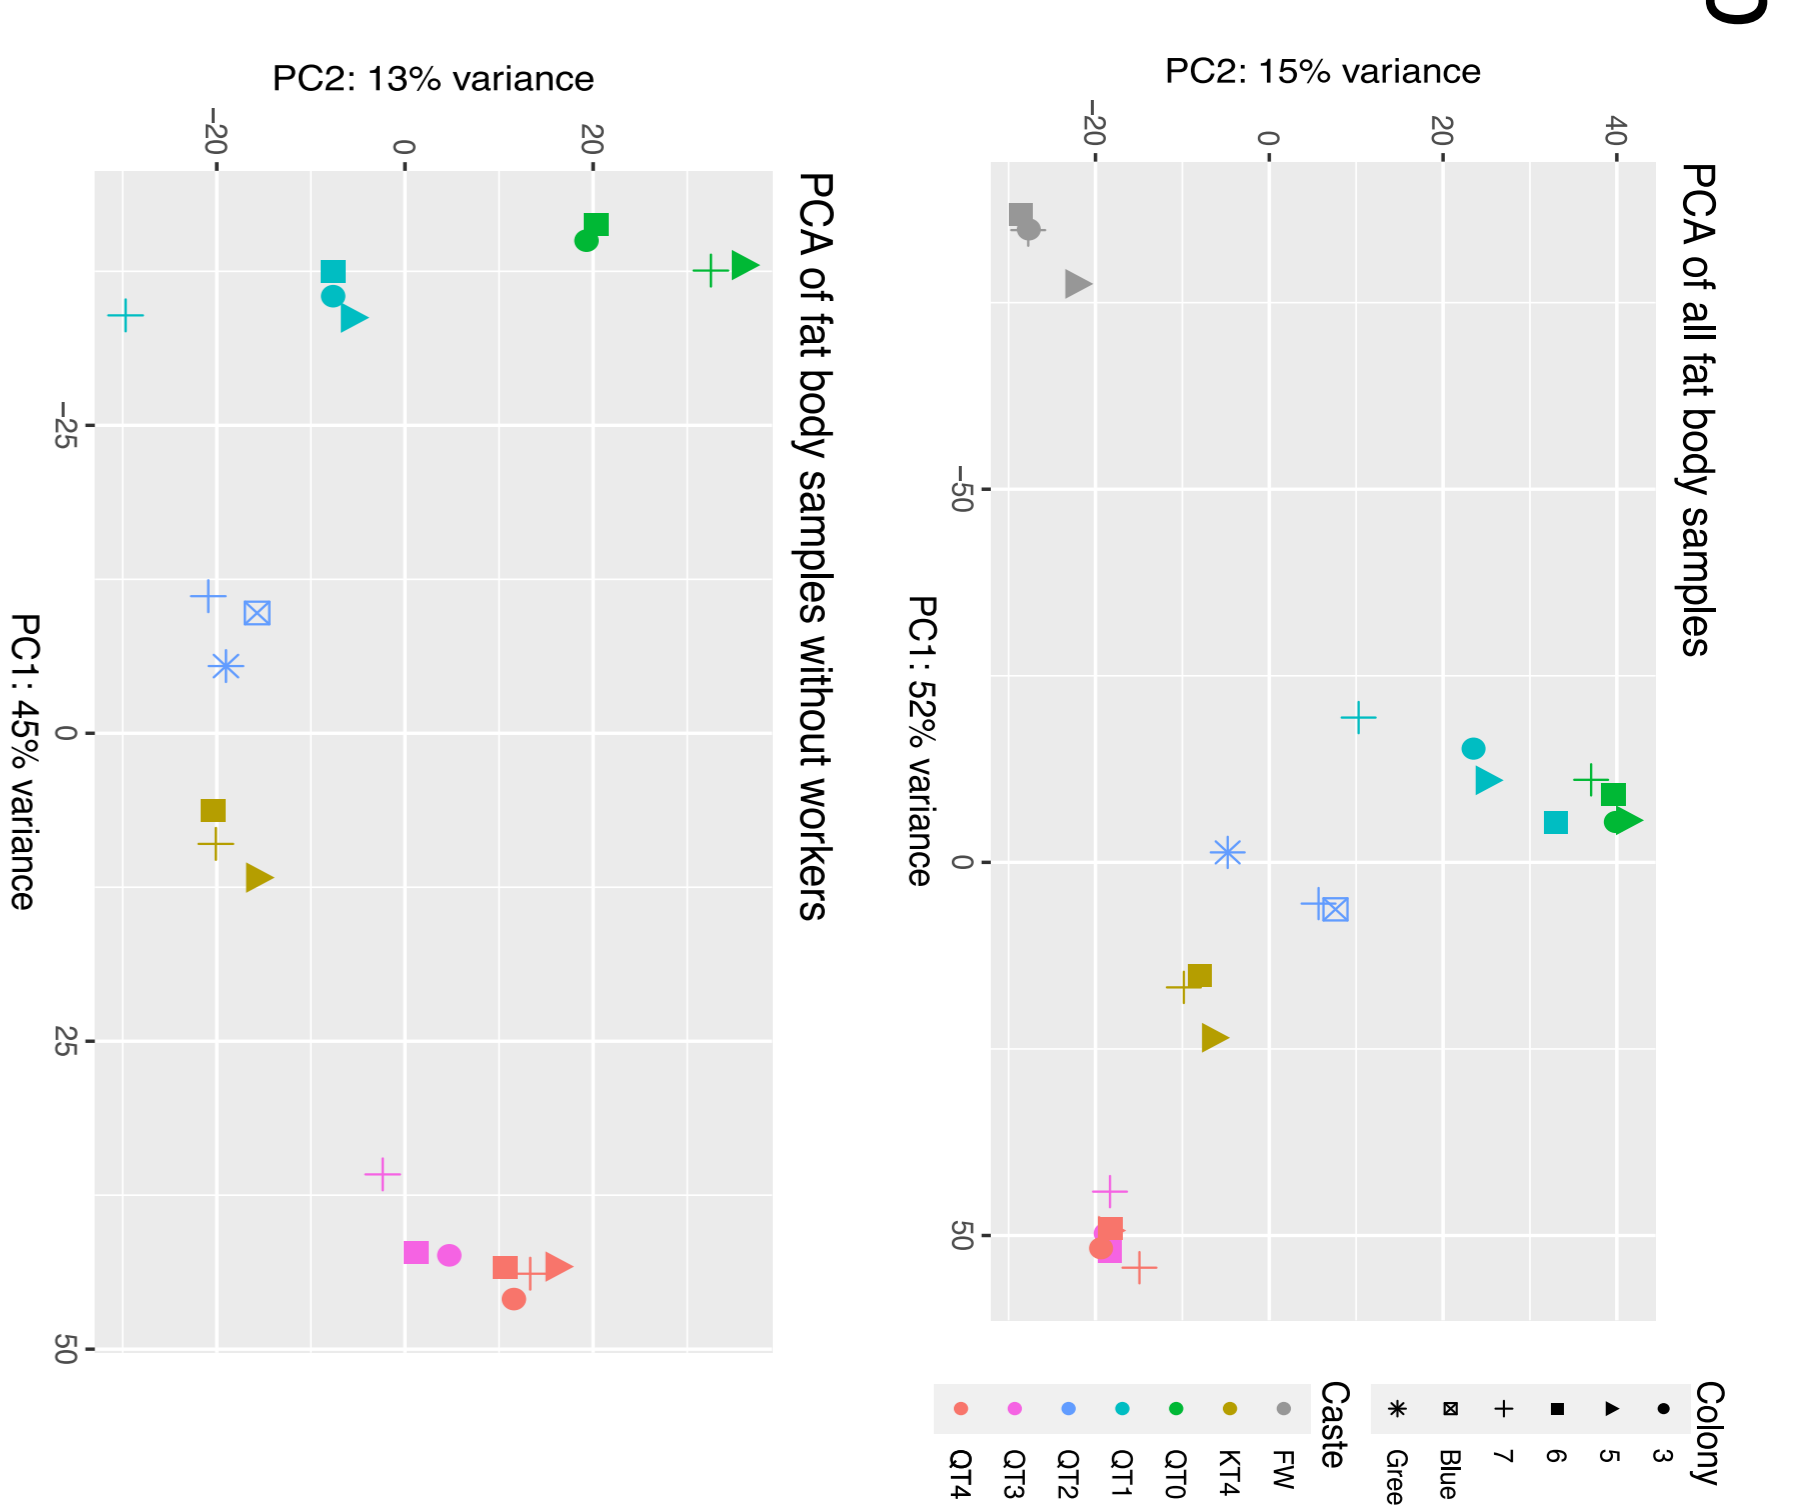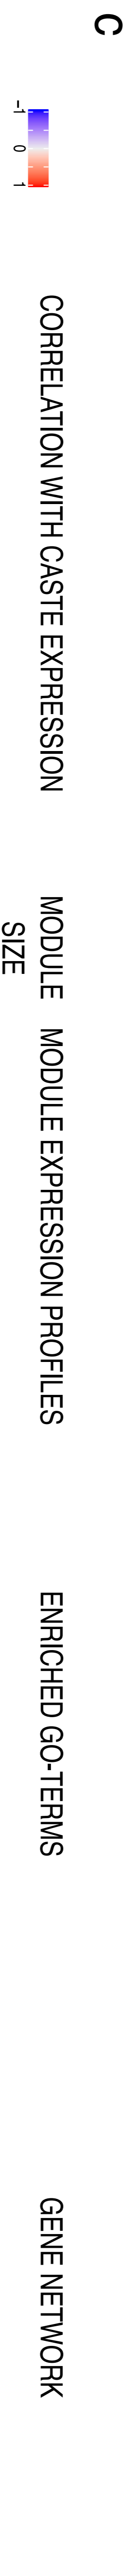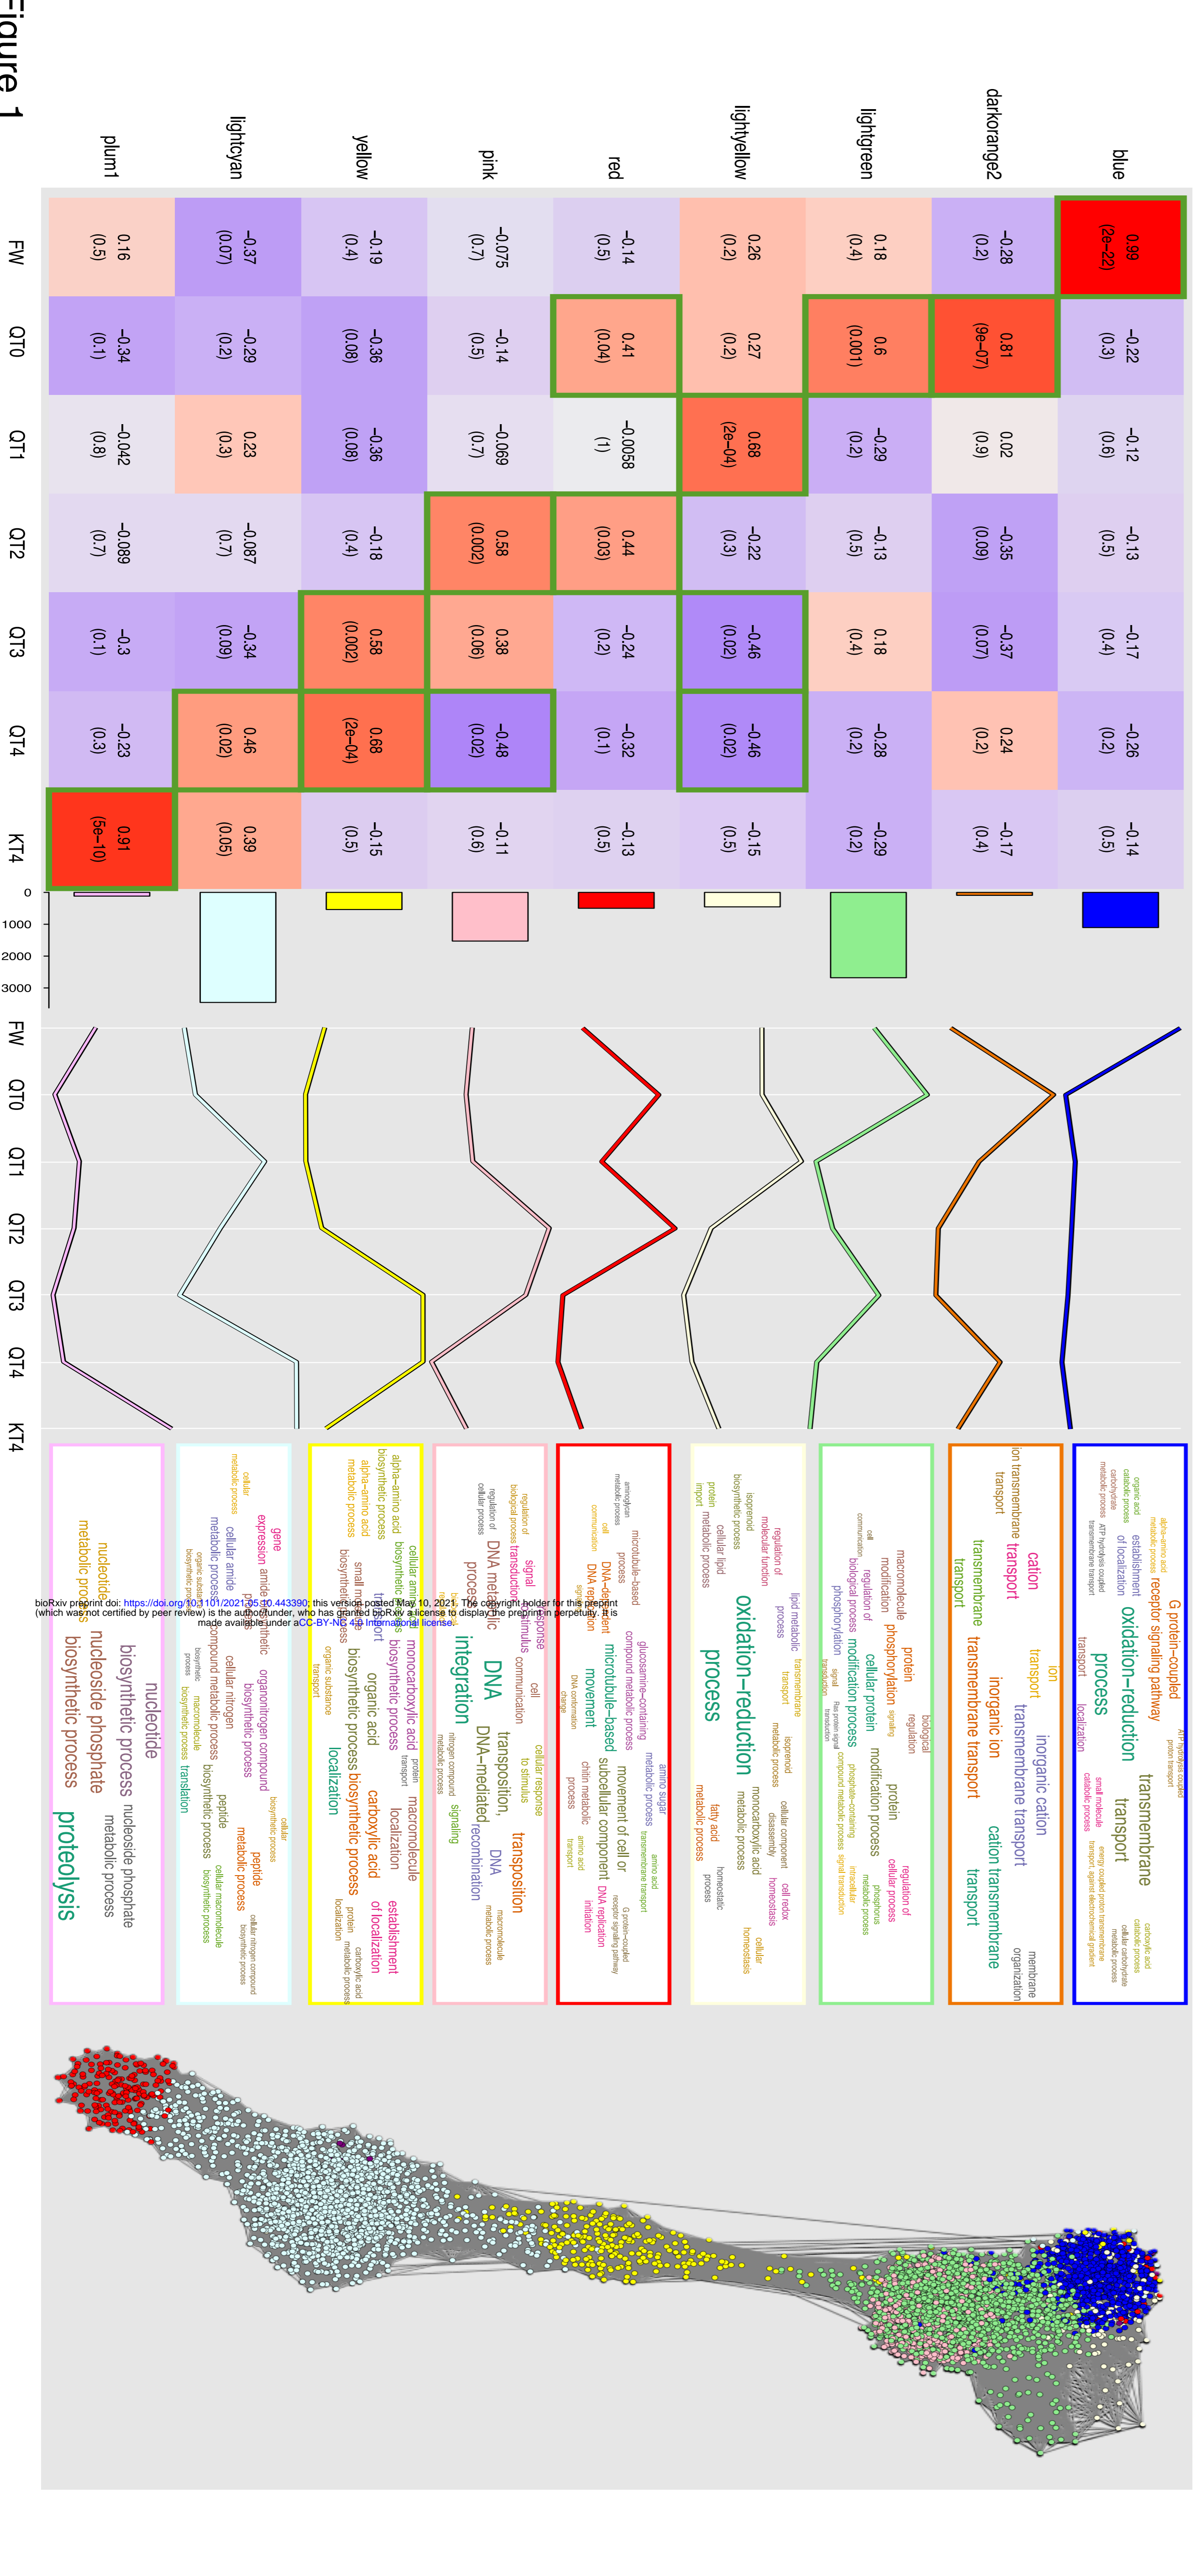



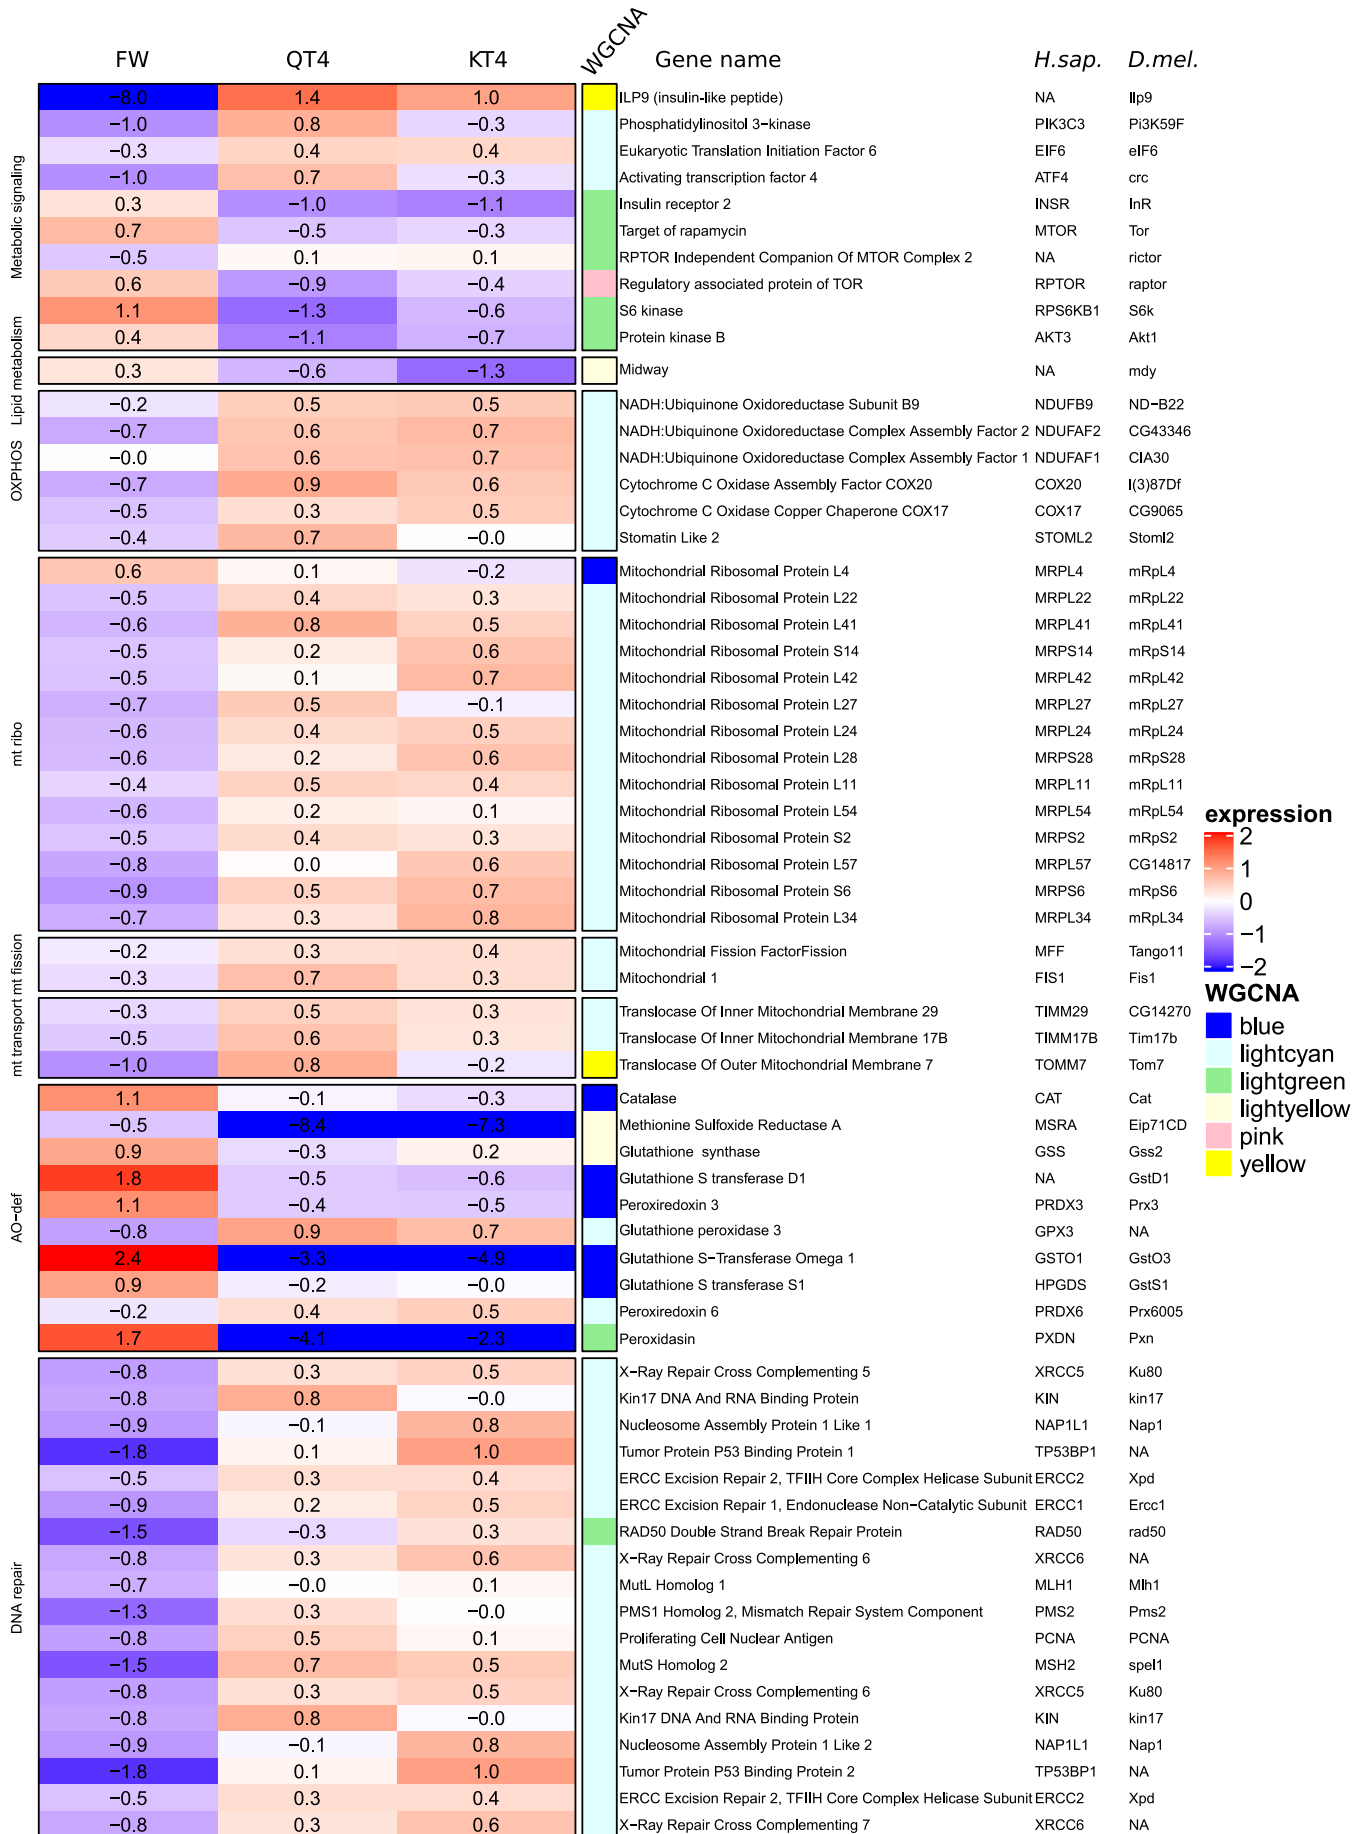

Figure 2

Gene Expression

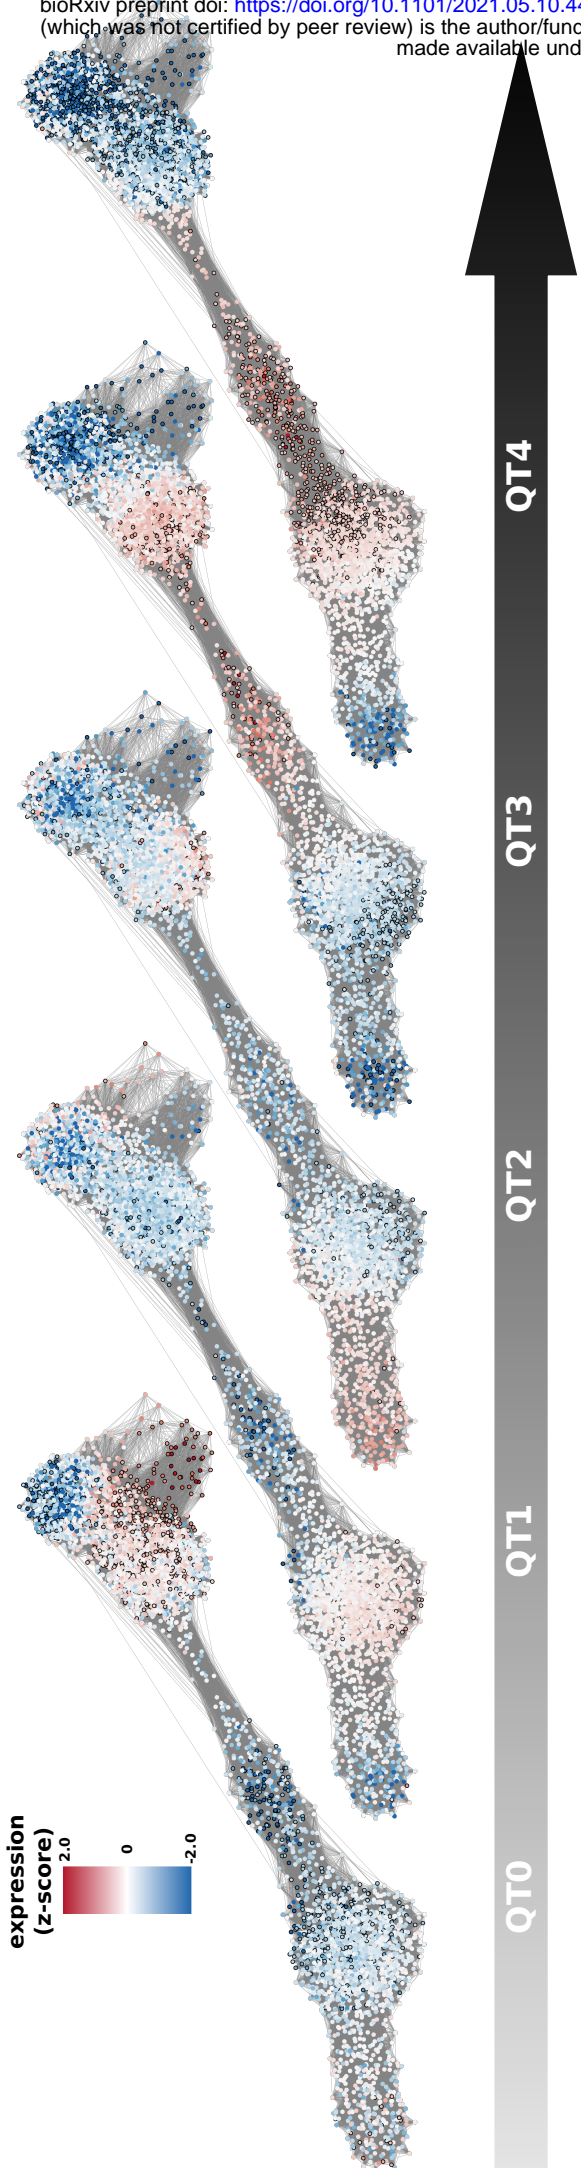

GO term enrichment

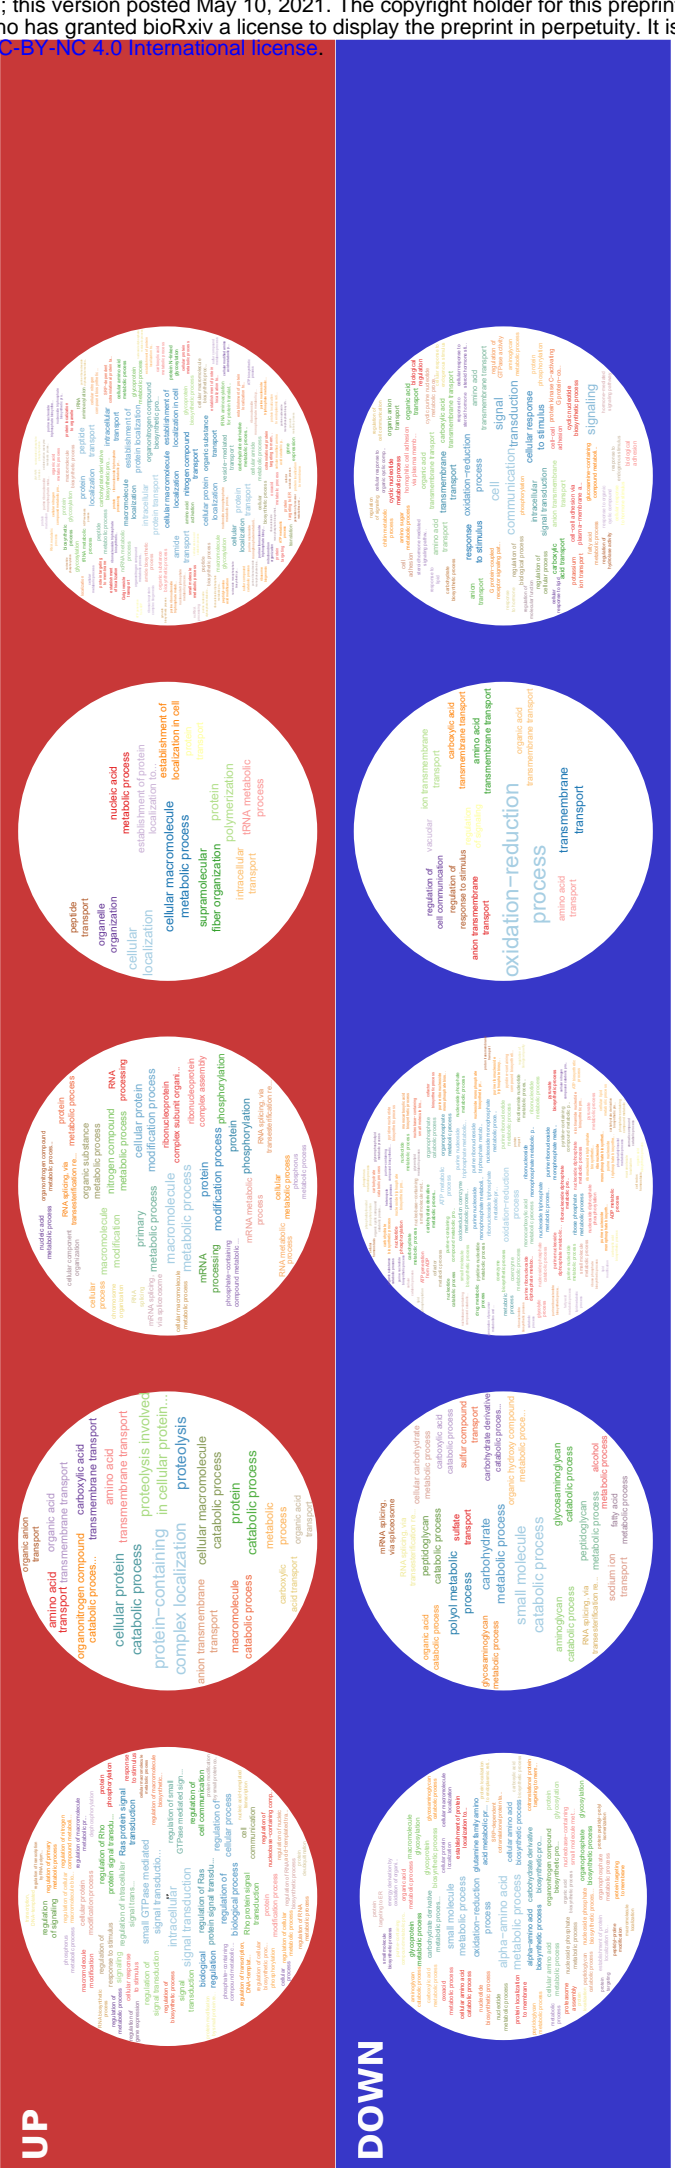

Figure 3

## Lipid metabolism

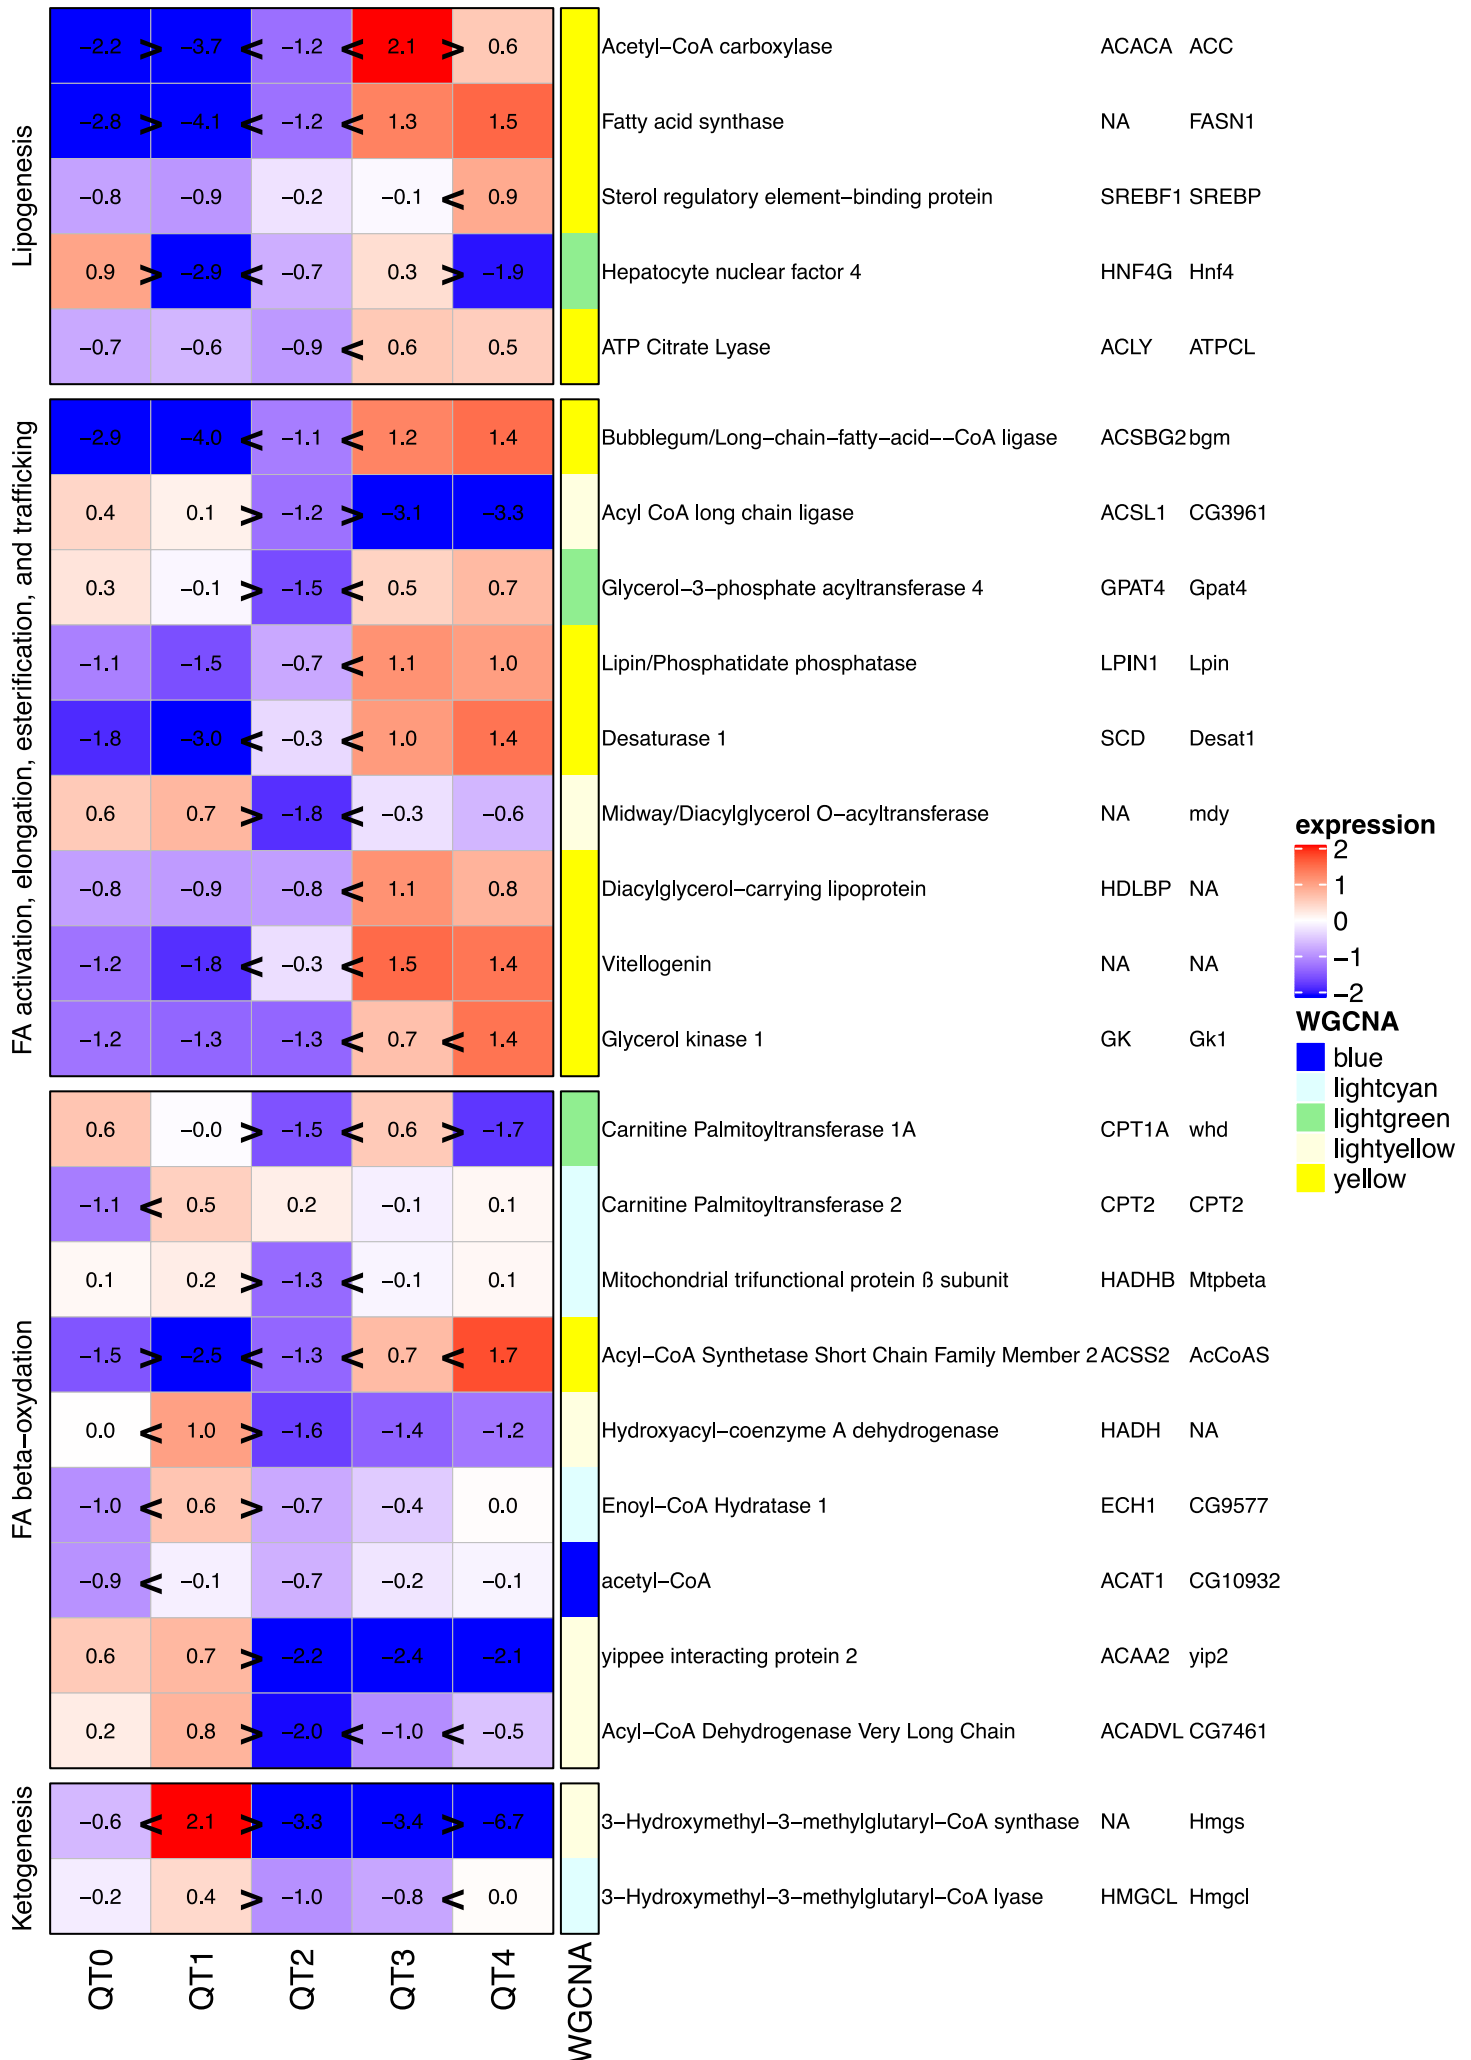

Figure 4

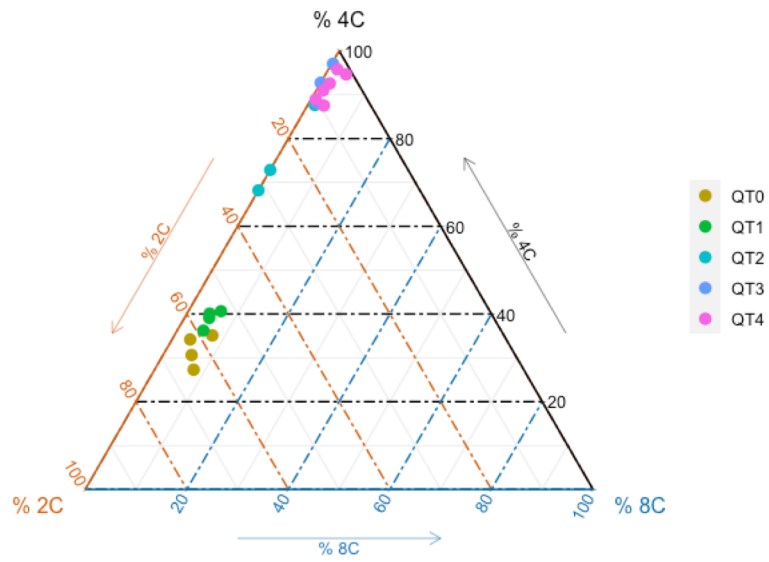

|               | QT0  | QT1  | QT2  | QT3  | QT4  |
|---------------|------|------|------|------|------|
| <b>2C (%)</b> | 62.1 | 55.8 | 23.3 | 6.8  | 5.9  |
| <b>4C (%)</b> | 31.8 | 39.0 | 76.2 | 92.7 | 91.4 |
| <b>8C (%)</b> | 6.1  | 5.2  | 0.5  | 0.6  | 2.6  |

Figure 5

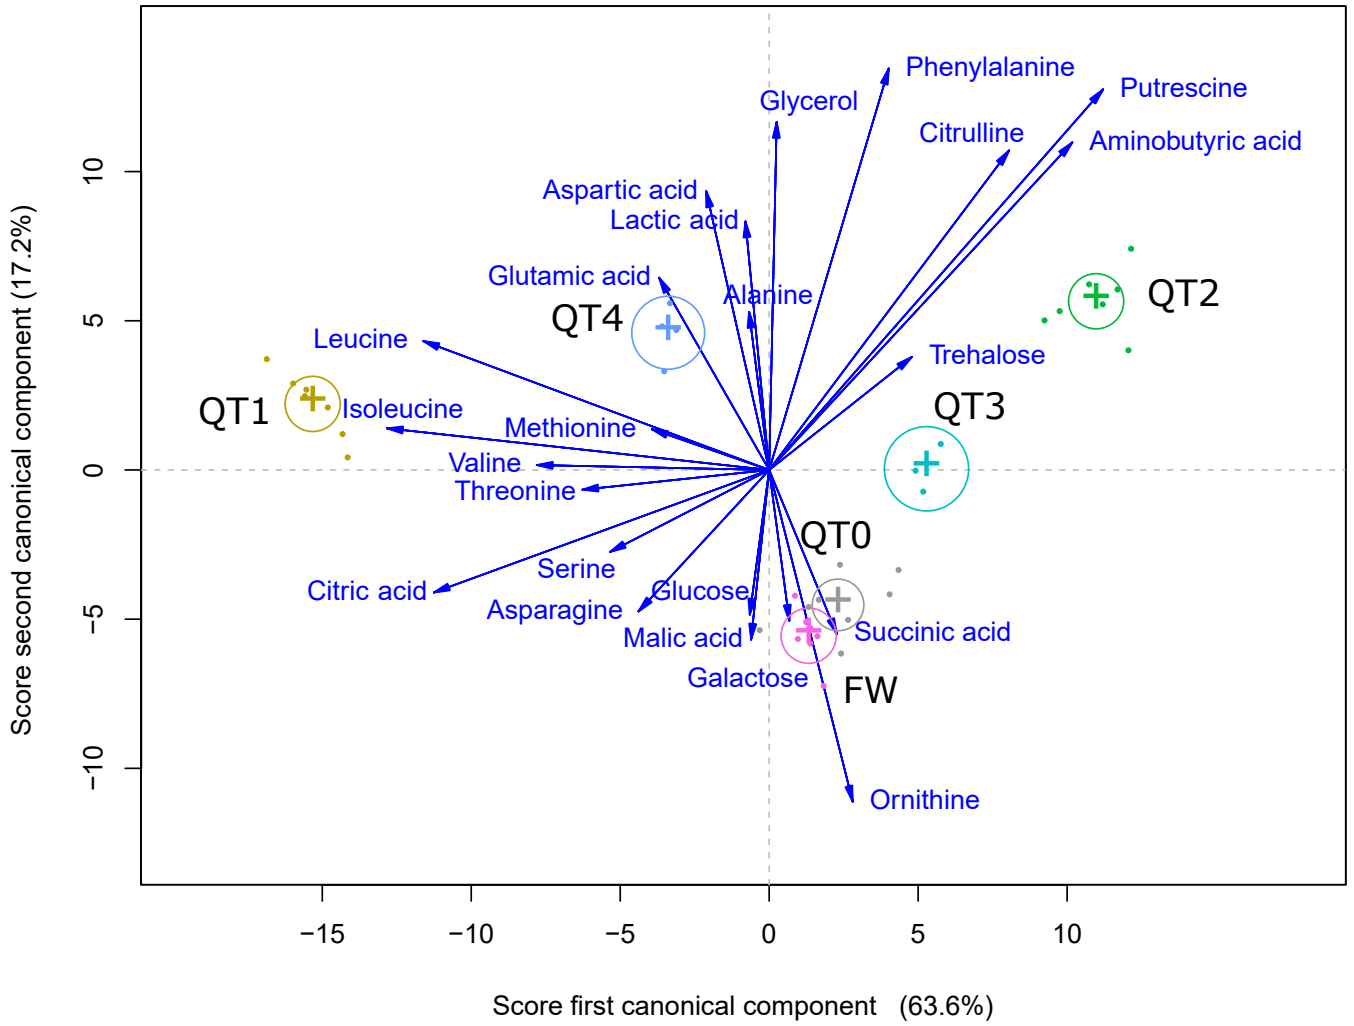

Figure 6

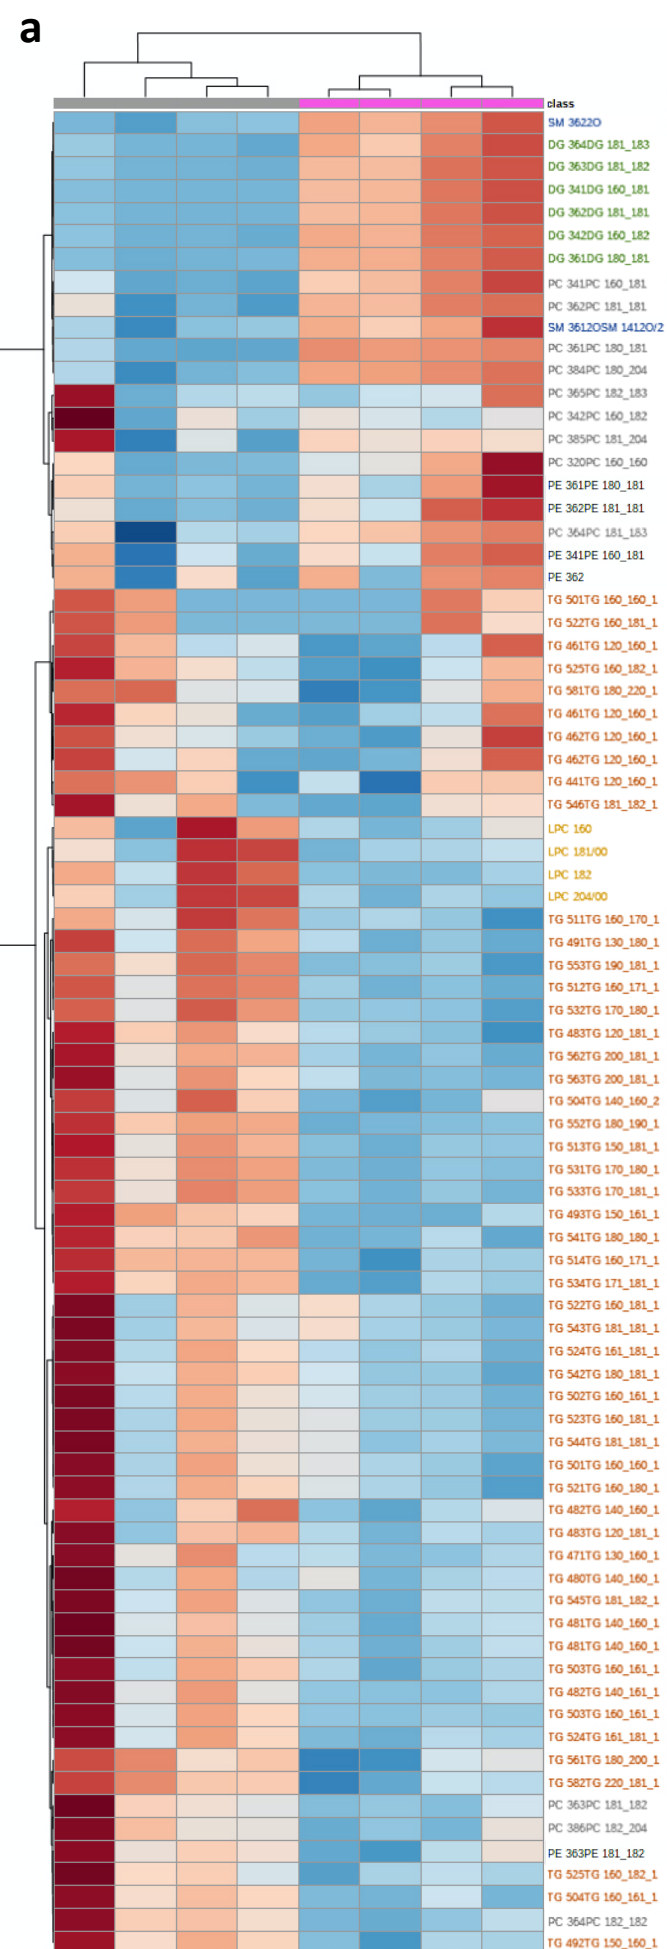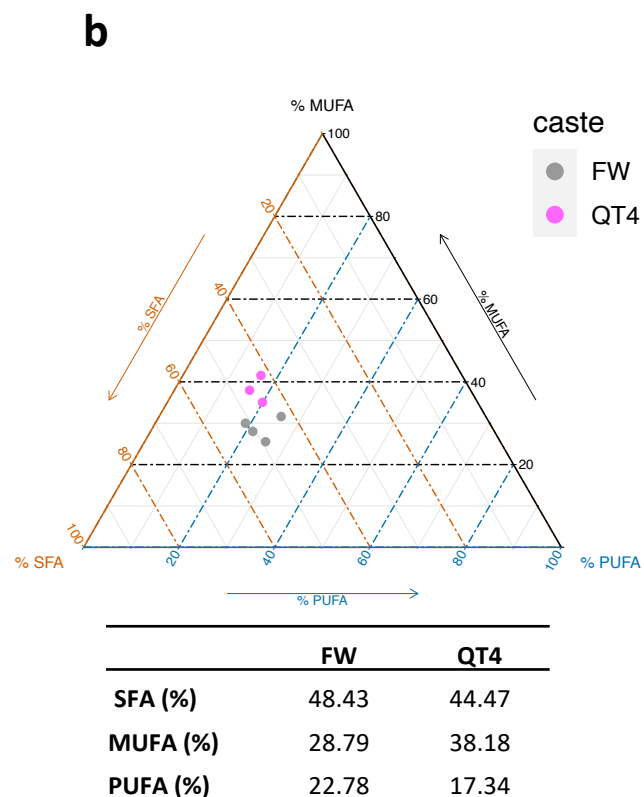

Figure 7
